# Supplementary material
Source: PubMed Central journal article supplement (PMC4217635)
Supplement: NIHMS607092-supplement-1.pdf [file NIHMS607092-supplement-1.pdf]

***Supplementary Information***

**c-di-AMP binds the *ydaO* riboswitch in  
two pseudo-symmetry-related pockets**

**Aiming Ren<sup>1</sup> & Dinshaw J. Patel<sup>1,\*</sup>**

<sup>1</sup>Structural Biology Program  
Memorial Sloan-Kettering Cancer Center  
New York, NY 10065, USA

\* email: [pateld@mskcc.org](mailto:pateld@mskcc.org)

## Supplementary Results

**Supplementary Table 1. Crystallographic statistics for *T. tengcongensis* ydaO riboswitch with bound c-di-AMP and c-di-dAMP.**

| Crystal                                              | c-di-AMP<br>-bound        | c-di-AMP<br>soaked with<br>[Ir(NH <sub>3</sub> ) <sub>6</sub> ] <sup>3+</sup> | c-di-dAMP<br>-bound     | c-di-AMP<br>soaked with<br>Mn <sup>2+</sup> |
|------------------------------------------------------|---------------------------|-------------------------------------------------------------------------------|-------------------------|---------------------------------------------|
| <b>Data collection</b>                               | 24-ID-E                   | X29A                                                                          | 24-ID-E                 | 24-ID-C                                     |
| Space group                                          | C222 <sub>1</sub>         | C222 <sub>1</sub>                                                             | C222 <sub>1</sub>       | C222 <sub>1</sub>                           |
| Cell dimensions                                      |                           |                                                                               |                         |                                             |
| <i>a</i> , <i>b</i> , <i>c</i> (Å)                   | 79.3, 88.2, 145.7         | 78.4, 88.3, 145.1                                                             | 77.9, 87.1, 144.6       | 79.3, 88.1, 145.7                           |
| $\alpha$ , $\beta$ , $\gamma$ (°)                    | 90, 90, 120               | 90, 90, 120                                                                   | 90, 90, 120             | 90, 90, 120                                 |
|                                                      |                           | <i>Peak</i>                                                                   |                         |                                             |
| Wavelength                                           | 0.9792                    | 1.1052                                                                        | 0.9792                  | 1.7712                                      |
| Resolution (Å)                                       | 50.0-2.73<br>(2.83-2.73)* | 50.0-2.90<br>(3.0-2.90)                                                       | 144-2.65<br>(2.79-2.65) | 145.7-3.57<br>(3.76-3.57)                   |
| <i>R</i> <sub>pim</sub> or <i>R</i> <sub>merge</sub> | 0.033 (0.725)             | 0.066(0.99)                                                                   | 0.047 (0.722)           | 0.074 (0.584)                               |
| <i>I</i> / $\sigma$ <i>I</i>                         | 31 (1.2)                  | 29 (1.5)                                                                      | 17.5 (1.1)              | 8.1 (1.3)                                   |
| Completeness (%)                                     | 99.7 (100)                | 99.0 (98.5)                                                                   | 99.7 (100)              | 97.8 (98.9)                                 |
| Redundancy                                           | 7.2 (7.4)                 | 14.6 (14.9)                                                                   | 7.0 (7.4)               | 6.1 (6.3)                                   |
| <b>Refinement</b>                                    |                           |                                                                               |                         |                                             |
| Resolution (Å)                                       | 45.6-2.69                 |                                                                               | 42.3-2.65               | 72.8-3.6                                    |
| No. reflections                                      | 14169                     |                                                                               | 14520                   | 11531                                       |
| <i>R</i> <sub>work</sub> / <i>R</i> <sub>free</sub>  | 0.21/0.24                 |                                                                               | 0.22/0.29               | 0.23/0.30                                   |
| No. atoms                                            |                           |                                                                               |                         |                                             |
| RNA                                                  | 2316                      |                                                                               | 2617                    | 2316                                        |
| Ligand                                               | 88                        |                                                                               | 84                      | 88                                          |
| Cations                                              | 2                         |                                                                               | 2                       | 2                                           |
| Water                                                | 33                        |                                                                               | 7                       |                                             |
| B-factors                                            |                           |                                                                               |                         |                                             |
| RNA                                                  | 92.2                      |                                                                               | 85.1                    | 100.2                                       |
| Ligand                                               | 73.6                      |                                                                               | 57.6                    | 82.3                                        |
| Cations                                              | 79.1                      |                                                                               | 83.3                    | 48.1                                        |
| Water                                                | 96.9                      |                                                                               | 85.6                    |                                             |
| R.m.s deviations                                     |                           |                                                                               |                         |                                             |
| Bond lengths (Å)                                     | 0.010                     |                                                                               | 0.015                   | 0.02                                        |
| Bond angles (°)                                      | 1.698                     |                                                                               | 1.820                   | 1.90                                        |

\*Values for the highest-resolution shell are in parentheses.

**Supplementary Table 2. ITC-based binding parameters for complex formation between c-di-AMP and *T. tengcongensis* ydaO riboswitch as a function of added cyclic dinucleotides and divalent cations.**

| RNA,<br>5 mM Mg <sup>2+</sup><br><b>Ligand</b> | $\Delta H$<br>Kcal/mol | $\Delta S$<br>cal/mol/deg | N              | Kd<br>$\mu M$    |
|------------------------------------------------|------------------------|---------------------------|----------------|------------------|
| c-di-AMP                                       | - 7.7 $\pm$ 0.1        | + 7.9                     | 1.8 $\pm$ 0.02 | 0.066 $\pm$ 0.02 |
| c-di-dAMP                                      | - 7.4 $\pm$ 0.4        | + 1.3                     | 2.0 $\pm$ 0.08 | 2.9 $\pm$ 0.8    |
| c-di-GMP                                       | --                     | --                        | --             | --               |
| c-di-IMP                                       | --                     | --                        | --             | --               |
| 3'3'-cGAMP                                     | --                     | --                        | --             | --               |
| 2'3'-cGAMP                                     | --                     | --                        | --             | --               |
| 2'2'-cGAMP                                     | --                     | --                        | --             | --               |

| RNA, c-di-AMP<br><b>mM Mg<sup>2+</sup></b> | $\Delta H$<br>Kcal/mol | $\Delta S$<br>cal/mol/deg | N              | Kd<br>$\mu M$   |
|--------------------------------------------|------------------------|---------------------------|----------------|-----------------|
| 1                                          | - 11.3 $\pm$ 0.3       | - 7.7                     | 1.6 $\pm$ 0.03 | 0.5 $\pm$ 0.12  |
| 20                                         | - 8.4 $\pm$ 0.1        | + 6.2                     | 1.5 $\pm$ 0.01 | 0.05 $\pm$ 0.02 |

| RNA, c-di-AMP<br><b>5 mM M<sup>2+</sup></b> | $\Delta H$<br>Kcal/mol | $\Delta S$<br>cal/mol/deg | N              | Kd<br>$\mu M$    |
|---------------------------------------------|------------------------|---------------------------|----------------|------------------|
| Mn <sup>2+</sup>                            | - 7.5 $\pm$ 0.08       | + 8.3                     | 1.6 $\pm$ 0.01 | 0.075 $\pm$ 0.02 |
| Ca <sup>2+</sup>                            | - 8.4 $\pm$ 0.15       | + 3.0                     | 1.7 $\pm$ 0.02 | 0.24 $\pm$ 0.06  |
| Ba <sup>2+</sup>                            | - 5.9 $\pm$ 0.12       | + 13.1                    | 1.7 $\pm$ 0.02 | 0.10 $\pm$ 0.04  |

**Supplementary Table 3. ITC-based binding parameters for complex formation between c-di-AMP and the *T. tengcongensis* ydaO riboswitch as a function of mutations of key tertiary interactions.**

| RNA, 5 mM Mg <sup>2+</sup><br>Ligand c-di-AMP<br><b>Mutant</b> | $\Delta H$<br>Kcal/mol | $\Delta S$<br>cal/mol/deg | N              | Kd<br>$\mu M$    |
|----------------------------------------------------------------|------------------------|---------------------------|----------------|------------------|
| G39C                                                           | - 4.5 $\pm$ 0.3        | + 10.5                    | 1.7 $\pm$ 0.08 | 3.1 $\pm$ 0.97   |
| A73C                                                           | - 4.3 $\pm$ 0.2        | + 11.6                    | 1.5 $\pm$ 0.05 | 2.8 $\pm$ 0.63   |
| G96C                                                           | - 7.9 $\pm$ 0.1        | + 8.5                     | 1.9 $\pm$ 0.01 | 0.034 $\pm$ 0.02 |
| U98C                                                           | --                     | --                        | --             | --               |
| 3AA                                                            | - 4.2 $\pm$ 0.2        | + 10.8                    | 1.5 $\pm$ 0.06 | 4.5 $\pm$ 0.90   |
| 3CC                                                            | - 3.1 $\pm$ 0.9        | + 11.6                    | 1.5 $\pm$ 0.33 | 19.8 $\pm$ 9.29  |
| A10C                                                           | - 7.7 $\pm$ 0.1        | + 4.5                     | 1.5 $\pm$ 0.02 | 0.36 $\pm$ 0.07  |
| A45C                                                           | - 4.5 $\pm$ 0.1        | + 15.7                    | 1.9 $\pm$ 0.02 | 0.24 $\pm$ 0.06  |
| A95C                                                           | - 6.4 $\pm$ 0.5        | + 3.9                     | 1.4 $\pm$ 0.08 | 3.9 $\pm$ 1.04   |

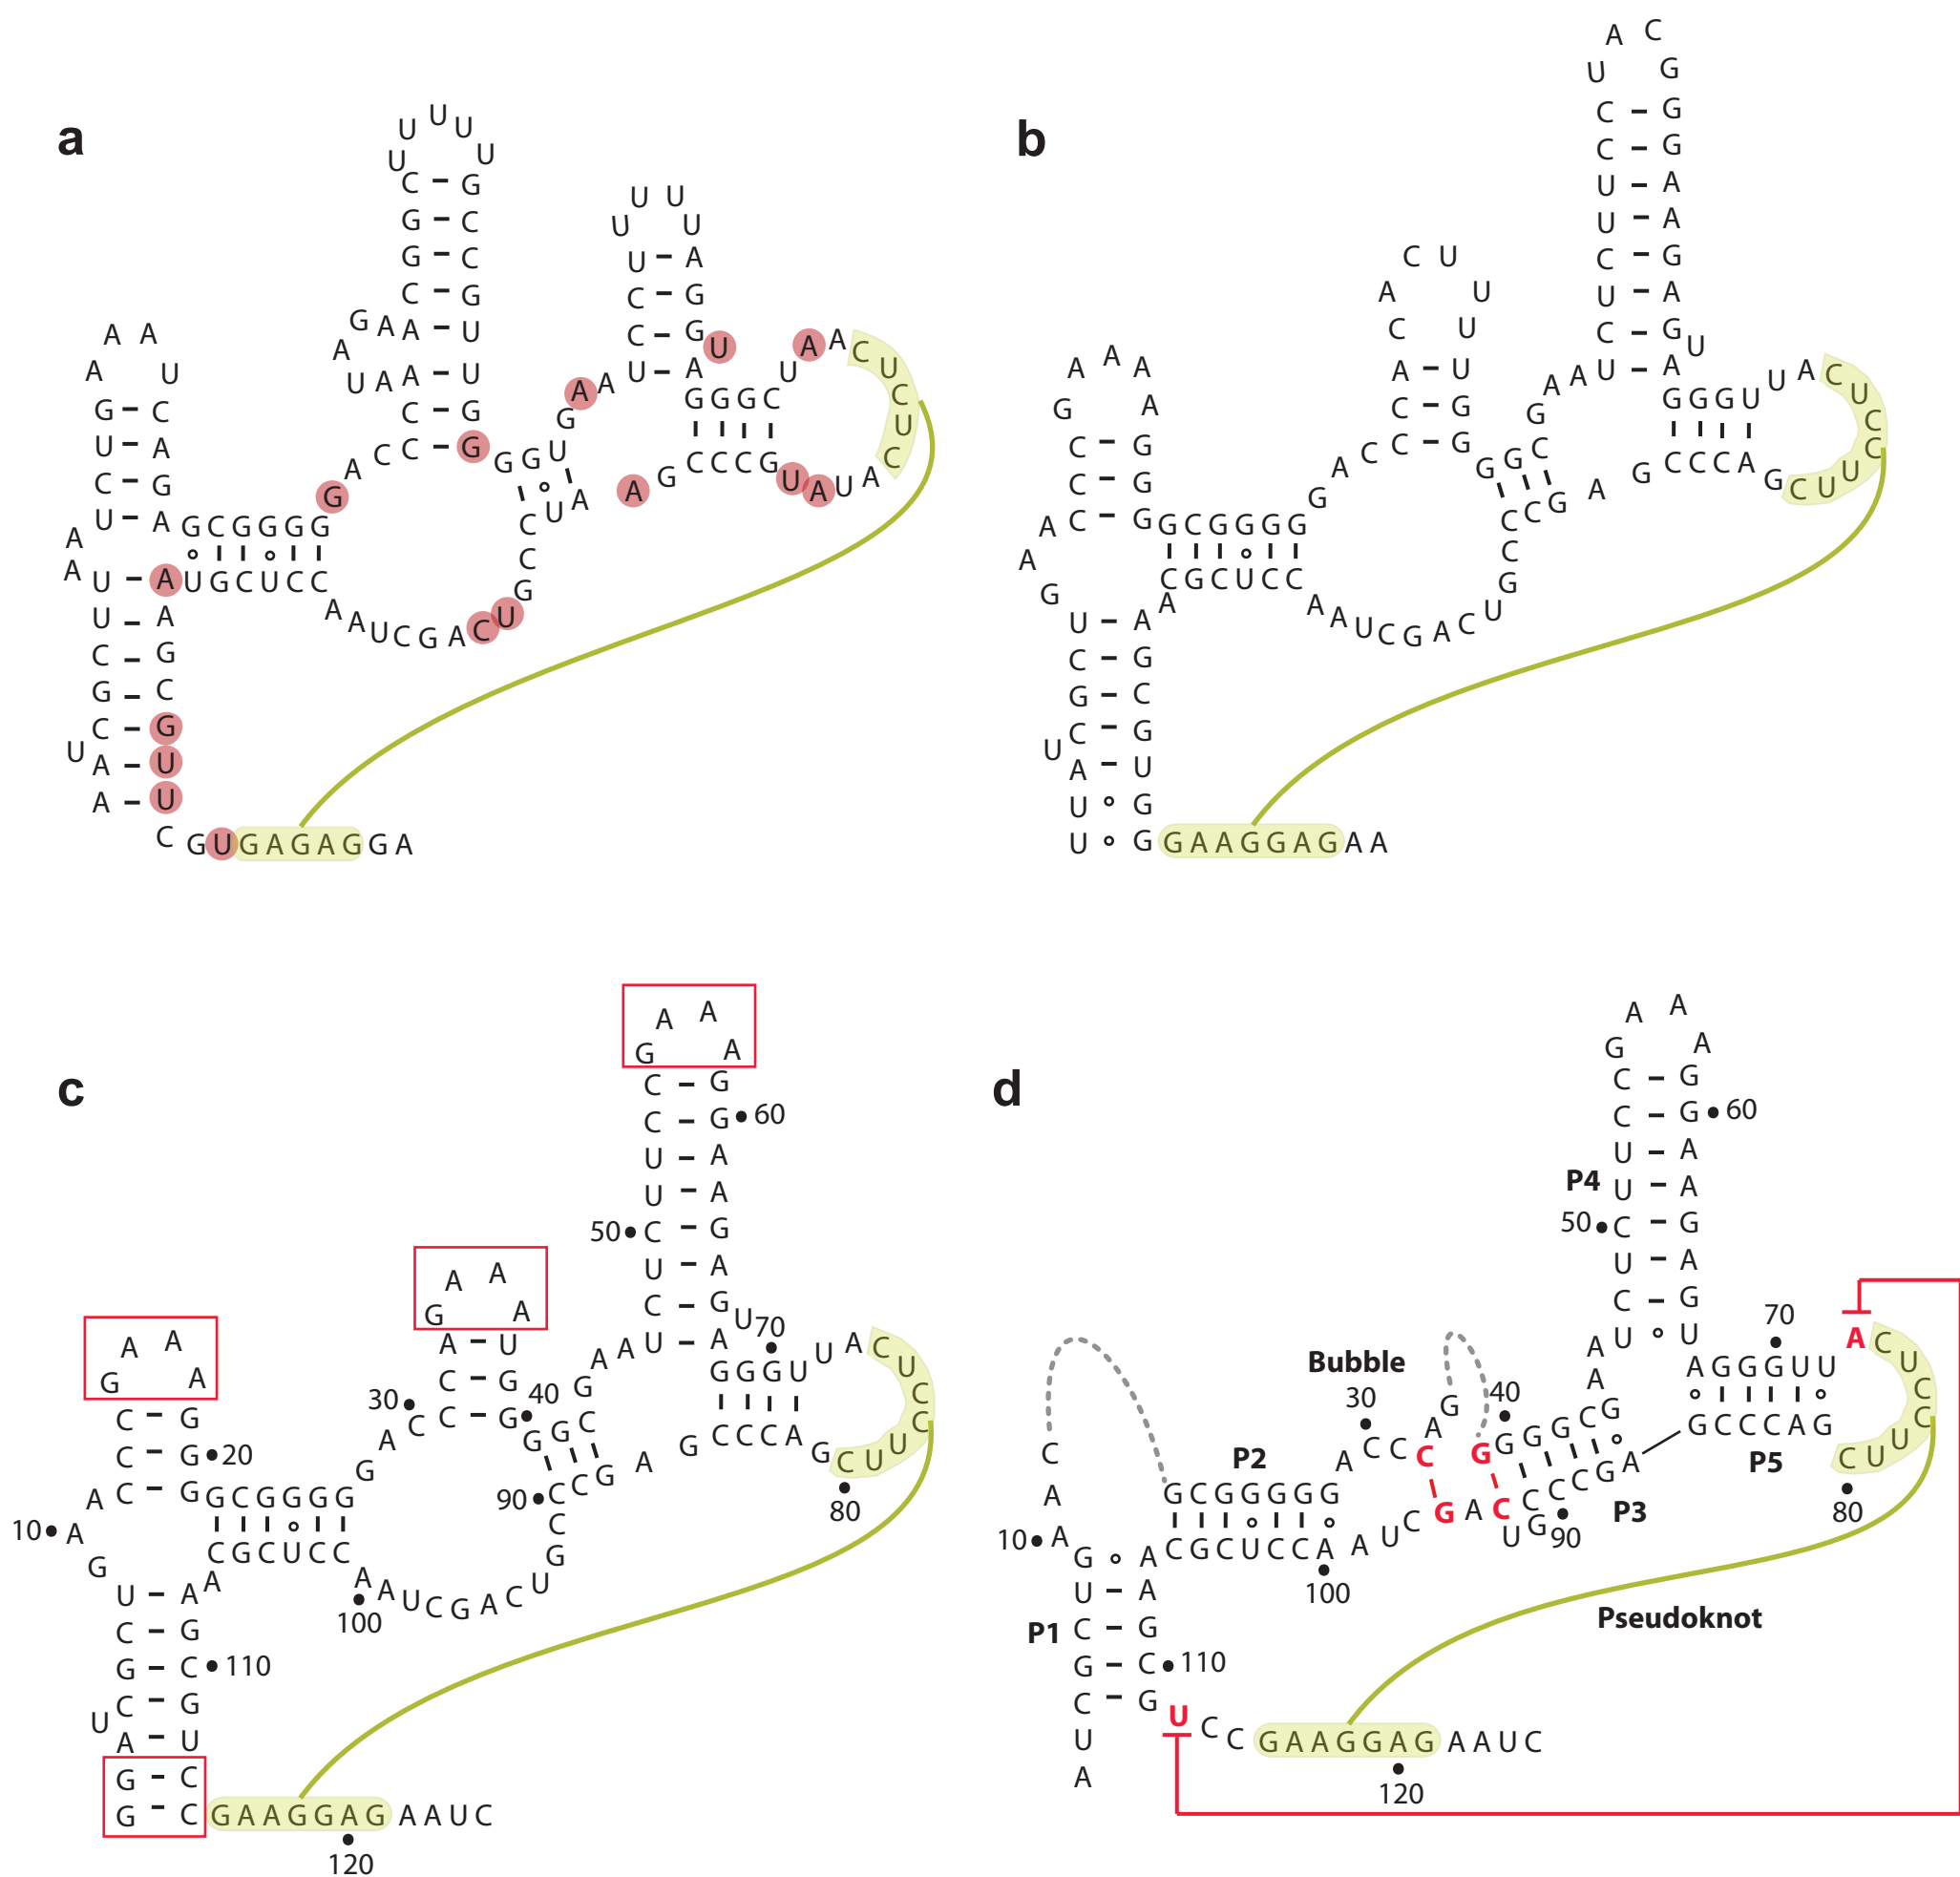

**Supplementary Figure 1 | Secondary structures of the sensing domains of the c-di-AMP-binding *ydaO* riboswitches from *B. subtilis* and *T. tengcongensis*.** **a**, Secondary structure of the sensing domain of the *B. subtilis* *ydaO* riboswitch<sup>20</sup>. Red-labeled nucleotides were protected during in-line probing on addition of c-di-AMP<sup>20</sup>. **b**, Secondary structure of the sensing domain of the *T. tengcongensis* *ydaO* riboswitch. **c**, Modifications (shown in red boxes) of the secondary structure of the sensing domain of the *T. tengcongensis* *ydaO* riboswitch (panel b) to facilitate *in vitro* transcription and crystallization. **d**, Secondary structure as elucidated from the crystal structure of the *T. tengcongensis* *ydaO* riboswitch with bound c-di-AMP.

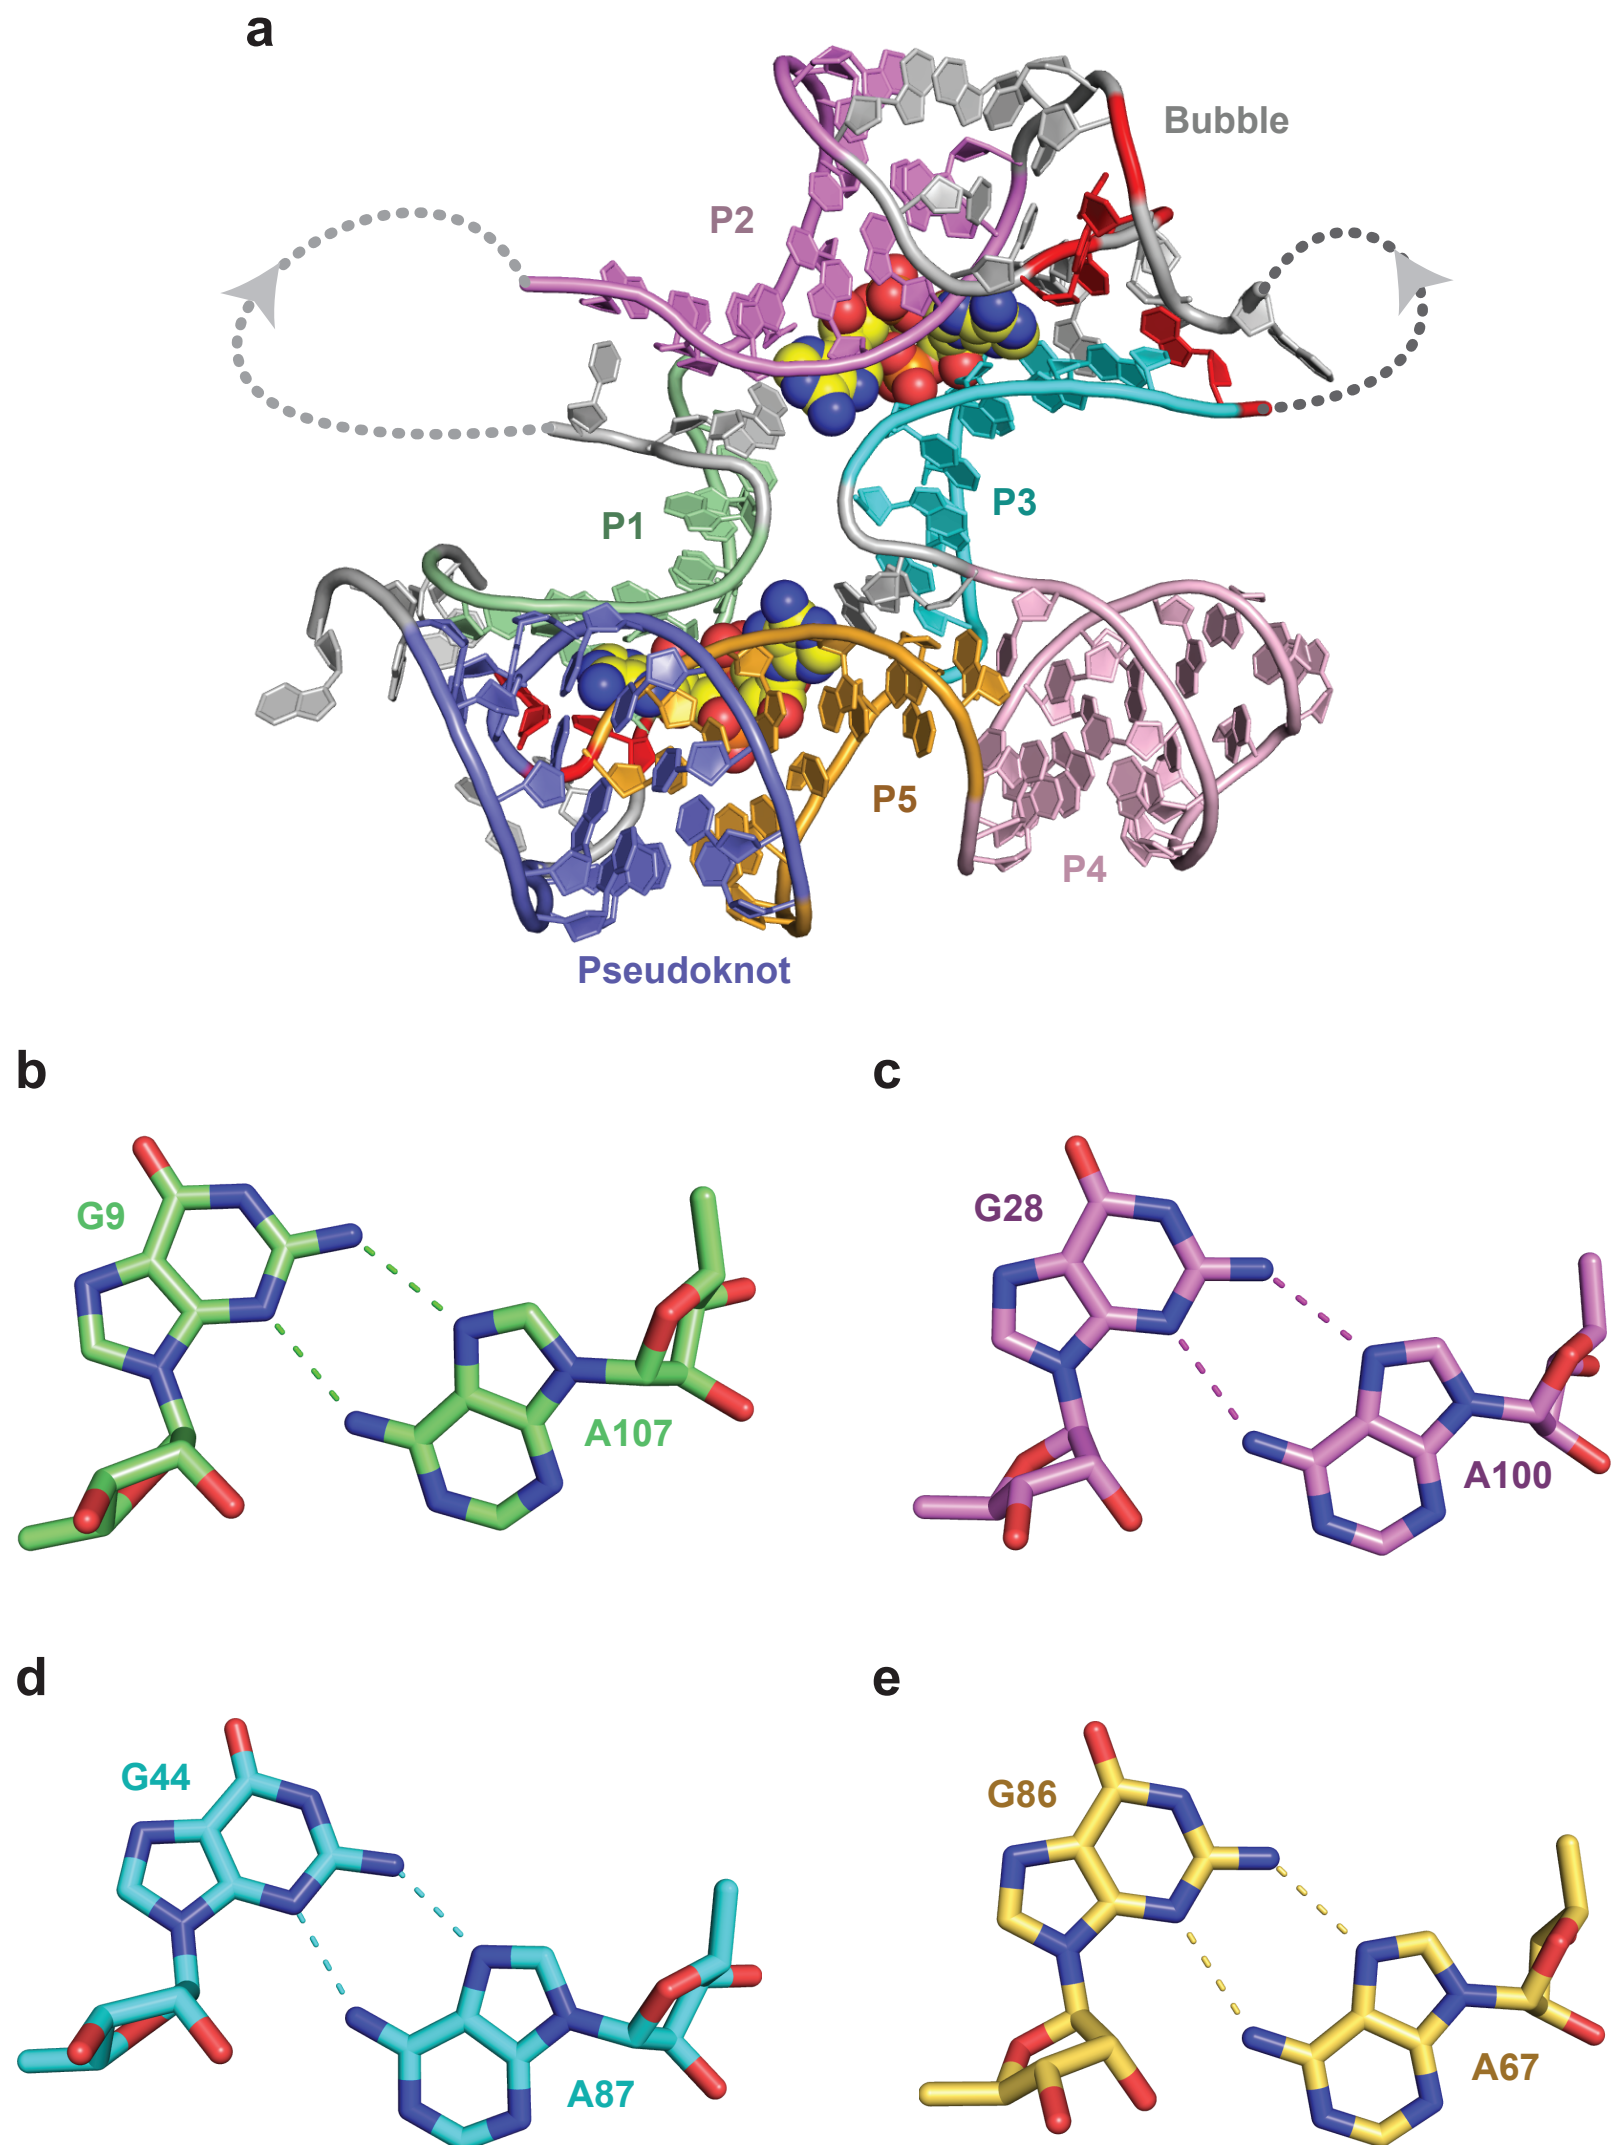

**Supplementary Figure 2 | An alternate view of the crystal structure of the *T. tengcongensis* *ydaO* riboswitch bound to two molecules of c-di-AMP, together with alignment of terminal sheared G•A pairs. a**, This view is rotated 180 degrees along the vertical axis relative to the structure shown in Fig. 1b. **b-e**, Four terminal sheared G•A pair alignments in the structure of the complex.

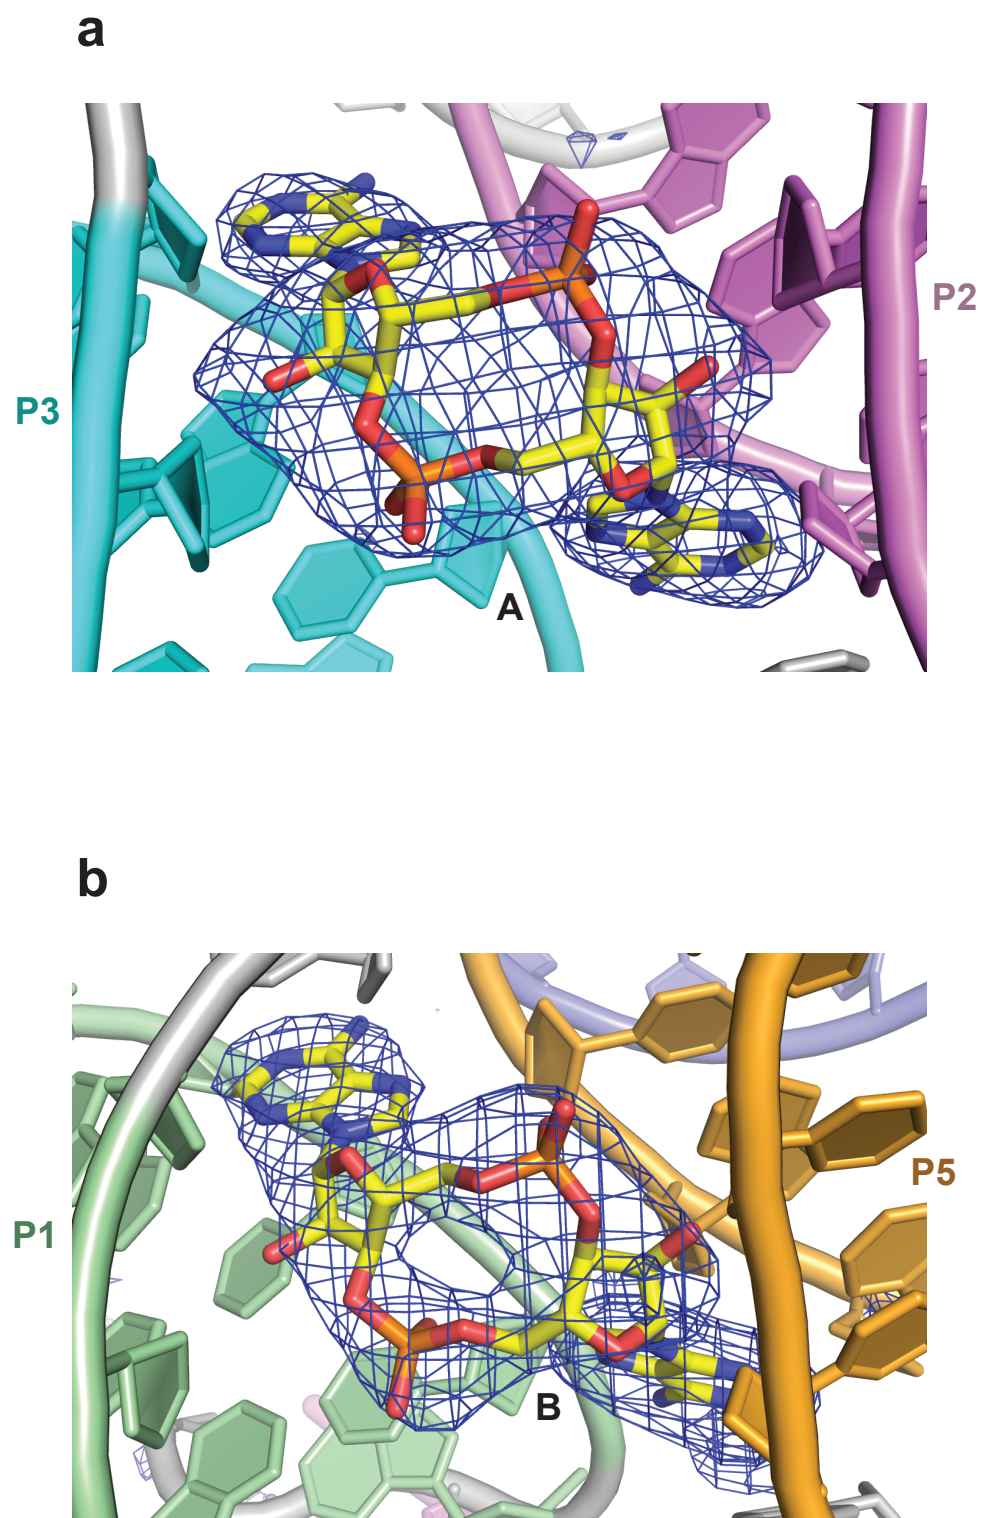

**Supplementary Figure 3 | Omit maps of bound c-di-AMP molecules in the structure of the *T. tengcongensis* *ydaO* riboswitch. a, b, Omit maps ( $3.0\sigma$ ) of bound c-di-AMP molecule A (panel a) and molecule B (panel b) in the structure of the c-di-AMP riboswitch.**

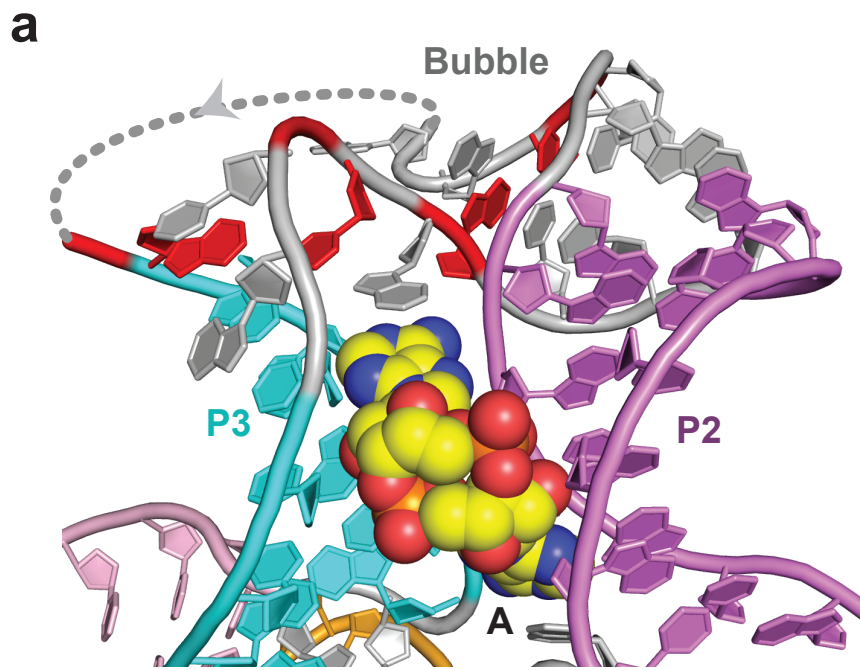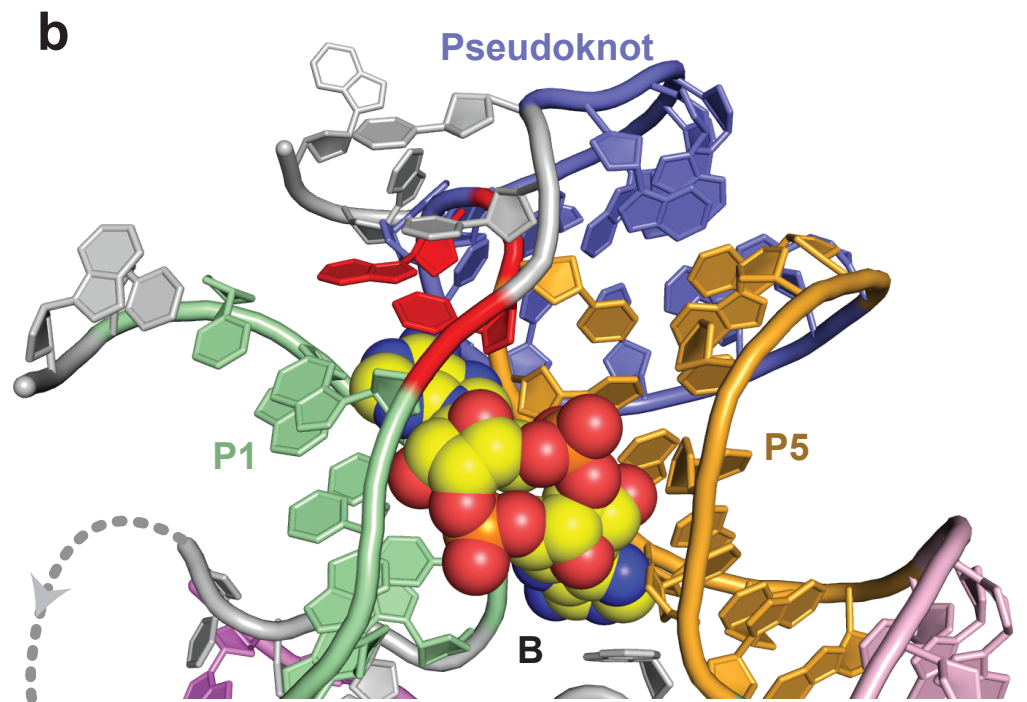

**Supplementary Figure 4 | Expanded view of two c-di-AMP binding pockets** **a**, An expanded view of c-di-AMP molecule A bound in a pocket formed by stems P2, P3 and the bubble segment. **b**, An expanded view of c-di-AMP molecule B bound in a pocket formed by stems P1, P5 and the pseudoknot segment.

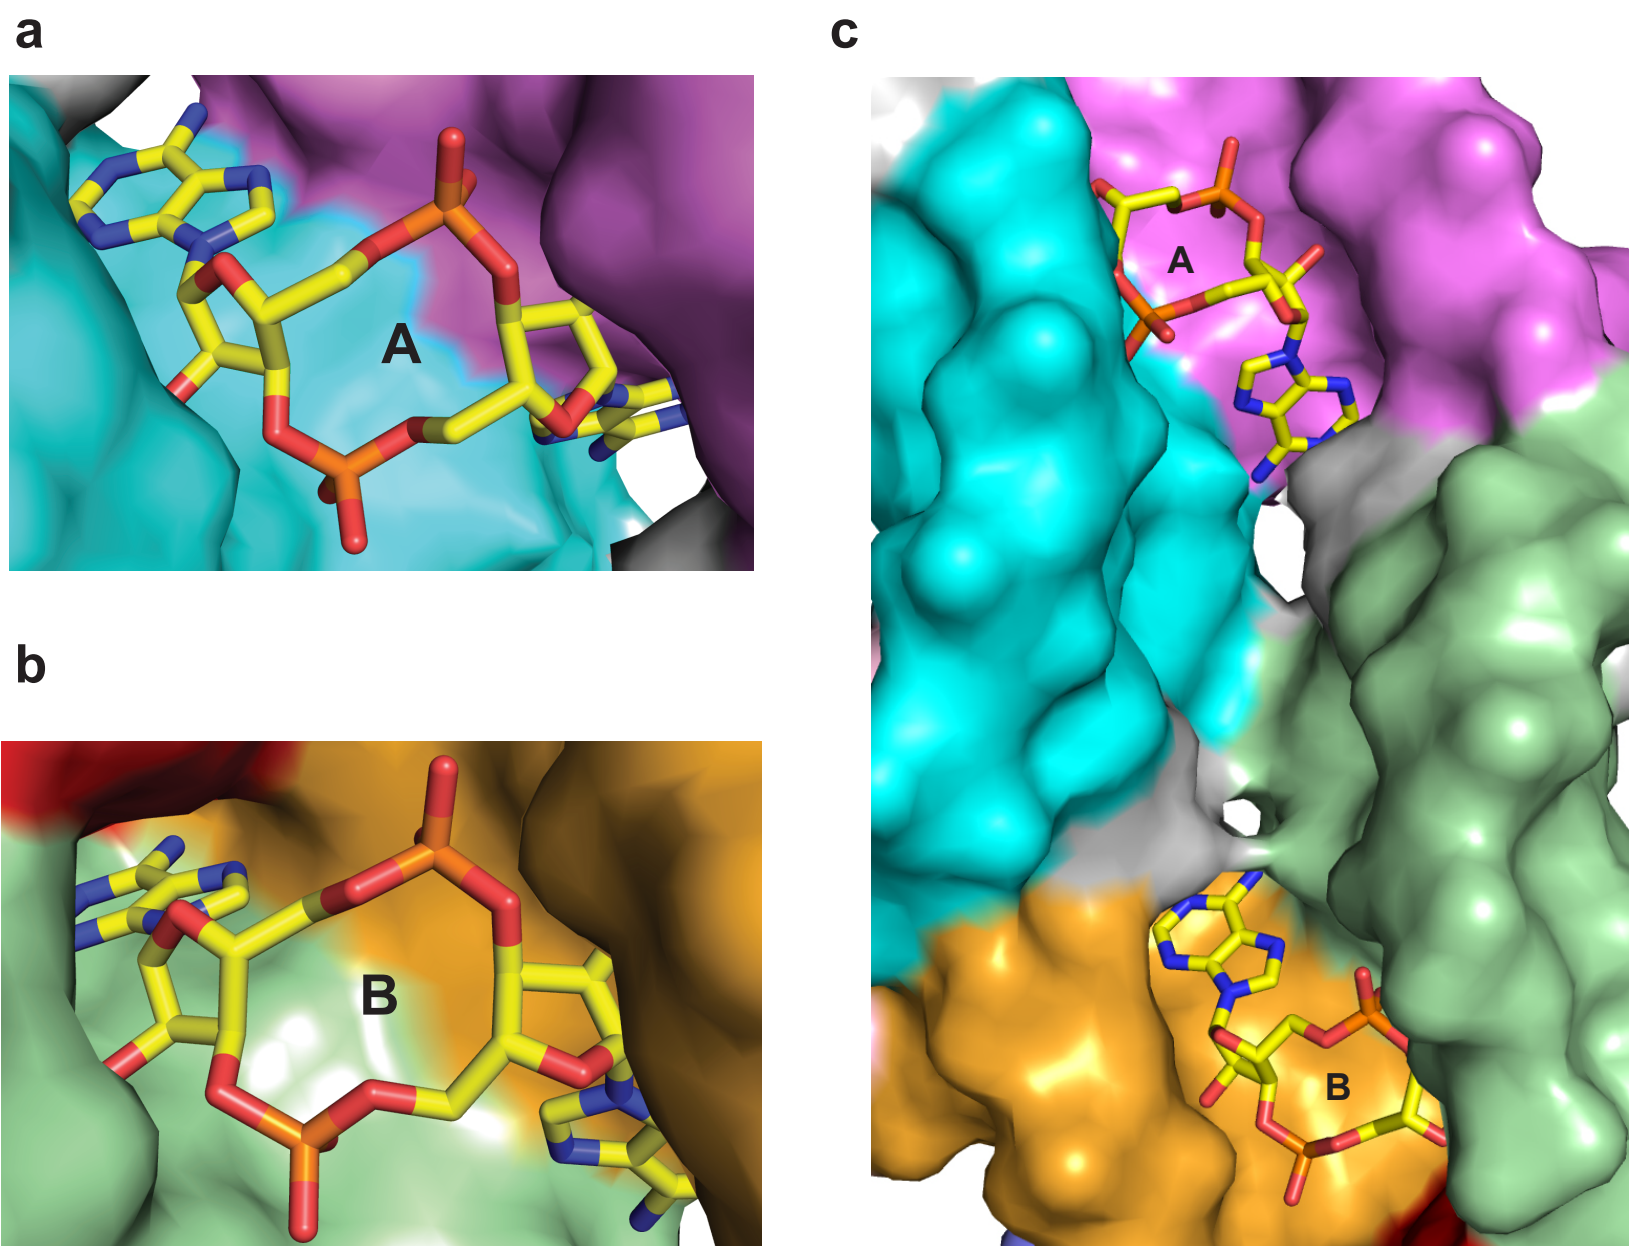

**Supplementary Figure 5 | Insertion of the adenine rings of c-di-AMP into both binding pockets in the *ydaO* riboswitch and the segment connecting binding pockets in the structure of the complex. a, b, Insertion of both adenine rings of c-di-AMP molecules A (panel a) and B (panel b) into binding pockets in *ydaO* riboswitch complex. The riboswitch is shown in a surface representation and color-coded by segments as shown in Fig. 1a. c, Depiction of the segment connecting c-di-AMP binding pockets in the structure of the complex.**

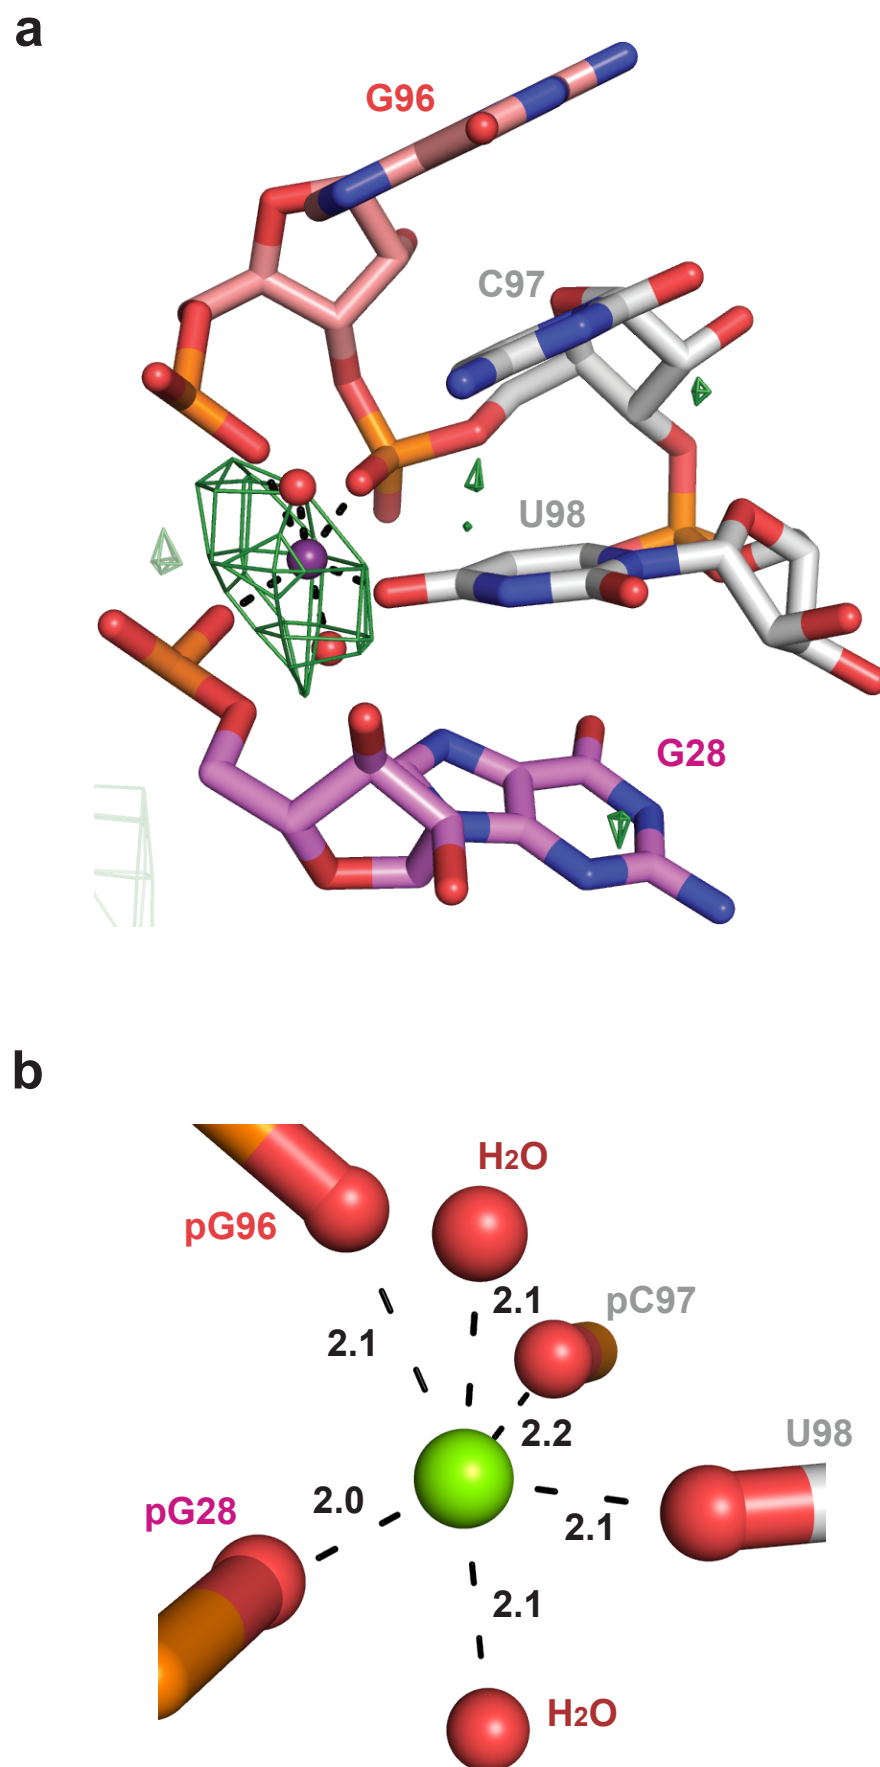

**Supplementary Figure 6 | The structure of the *T. tengcongensis* *ydaO* riboswitch-sensing domain in the bound state in the presence of  $\text{Mn}^{2+}$  cation. **a**, An expanded view of the bound  $\text{Mn}^{2+}$  cation-binding site in the *ydaO* riboswitch, with the  $\text{Mn}^{2+}$  anomalous electron density map contoured at  $3\sigma$  level. The  $\text{Mn}^{2+}$  cation and bound water molecules are shown as purple and red spheres. **b**, Bond distances (in Å) between the divalent cation and the coordinating residues of the alignment shown in panel a in the structure of the complex.**

**a**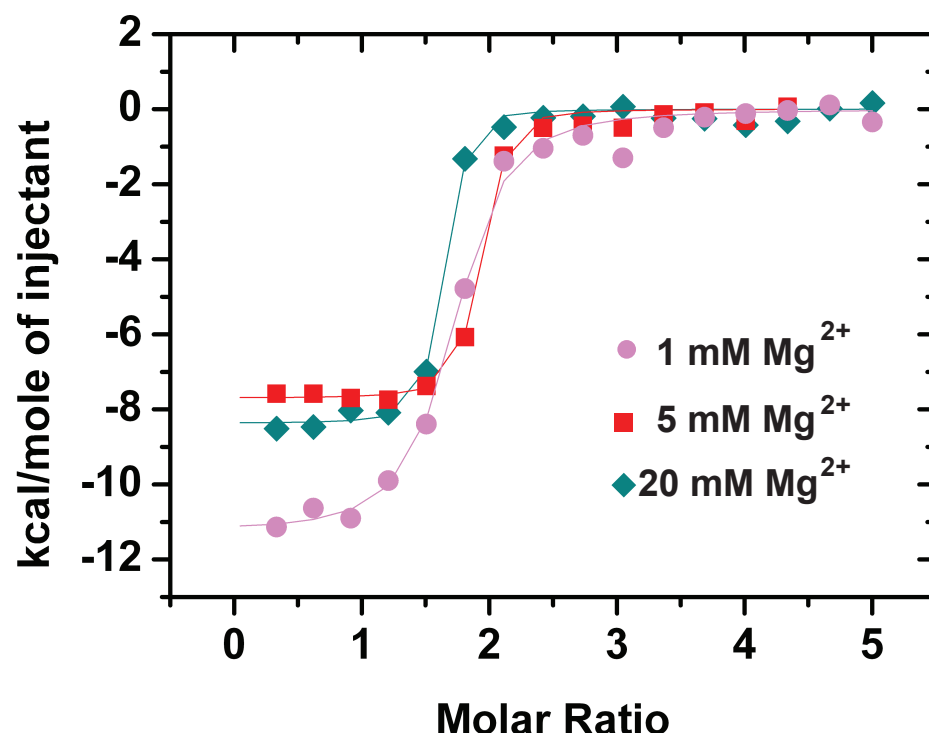**b**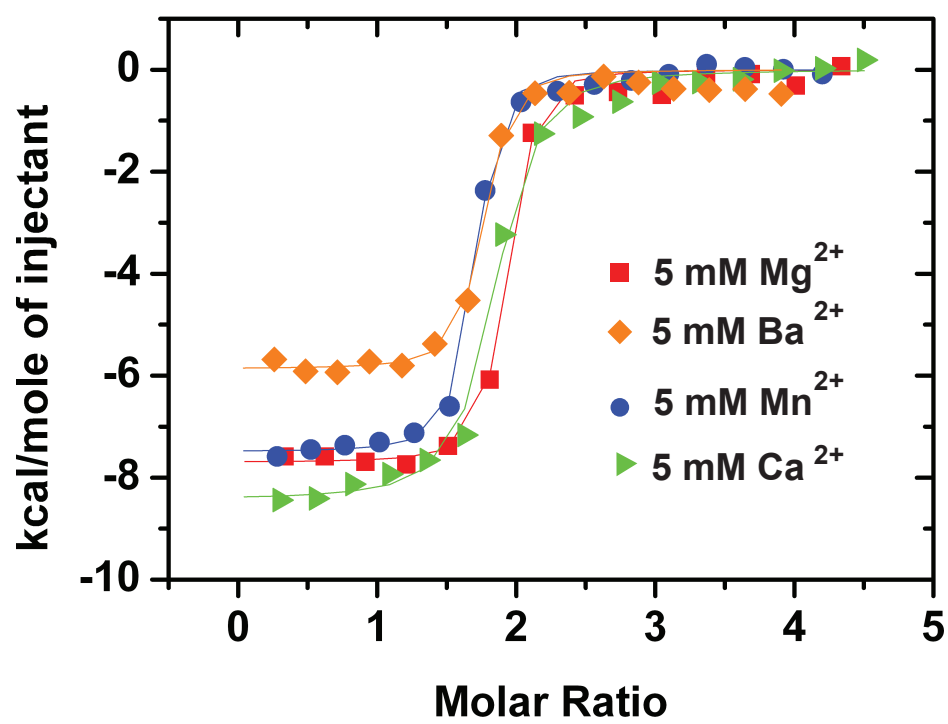

**Supplementary Figure 7 | ITC binding curves for titration of *T. tengcongensis* *ydaO* riboswitch with added c-di-AMP as a function of divalent cations. **a**, ITC binding curves of complex formation as a function of  $\text{Mg}^{2+}$  cation concentration. **b**, ITC binding curves of complex formation as a function of 5 mM  $\text{Mg}^{2+}$ ,  $\text{Mn}^{2+}$ ,  $\text{Ba}^{2+}$  and  $\text{Ca}^{2+}$  cations. In panels a and b, c-di-AMP was added gradually to the *T. tengcongensis* *ydaO* riboswitch.**

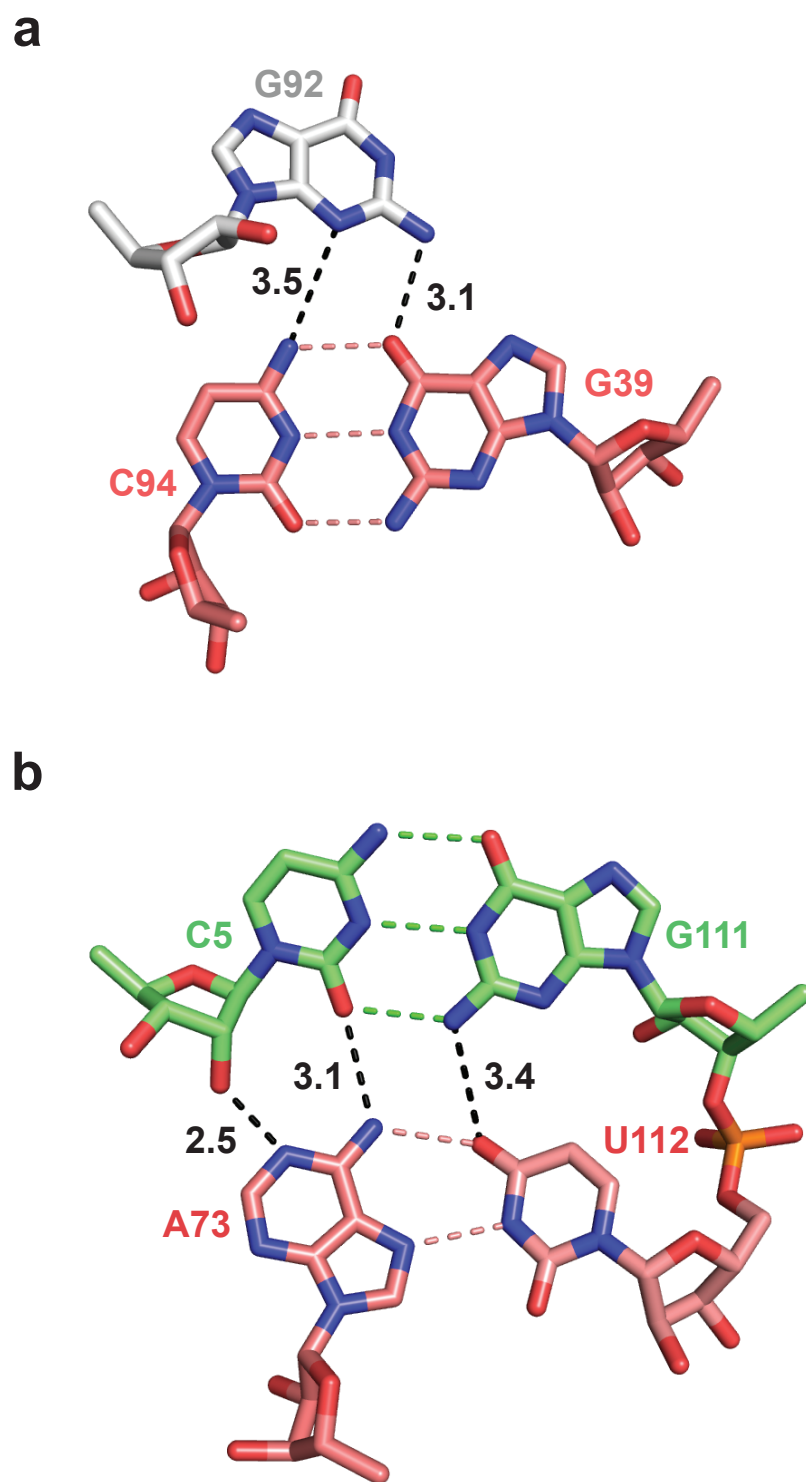

**Supplementary Figure 8 | Hydrogen bond distances for key tertiary pairing alignments in the structure of the c-di-AMP bound state of the *T. tengcongensis* *ydaO* riboswitch. **a**, Hydrogen bond distances (in Å, heteroatom to heteroatom) for the major groove base triple formed between G92 and the G39(*anti*)-C94(*syn*) pair. **b**, Hydrogen bond distances for the base tetrad formed by the long-range Hoogsteen A73•U112 pair aligning with the minor groove edge of the Watson-Crick C5-G111 pair.**

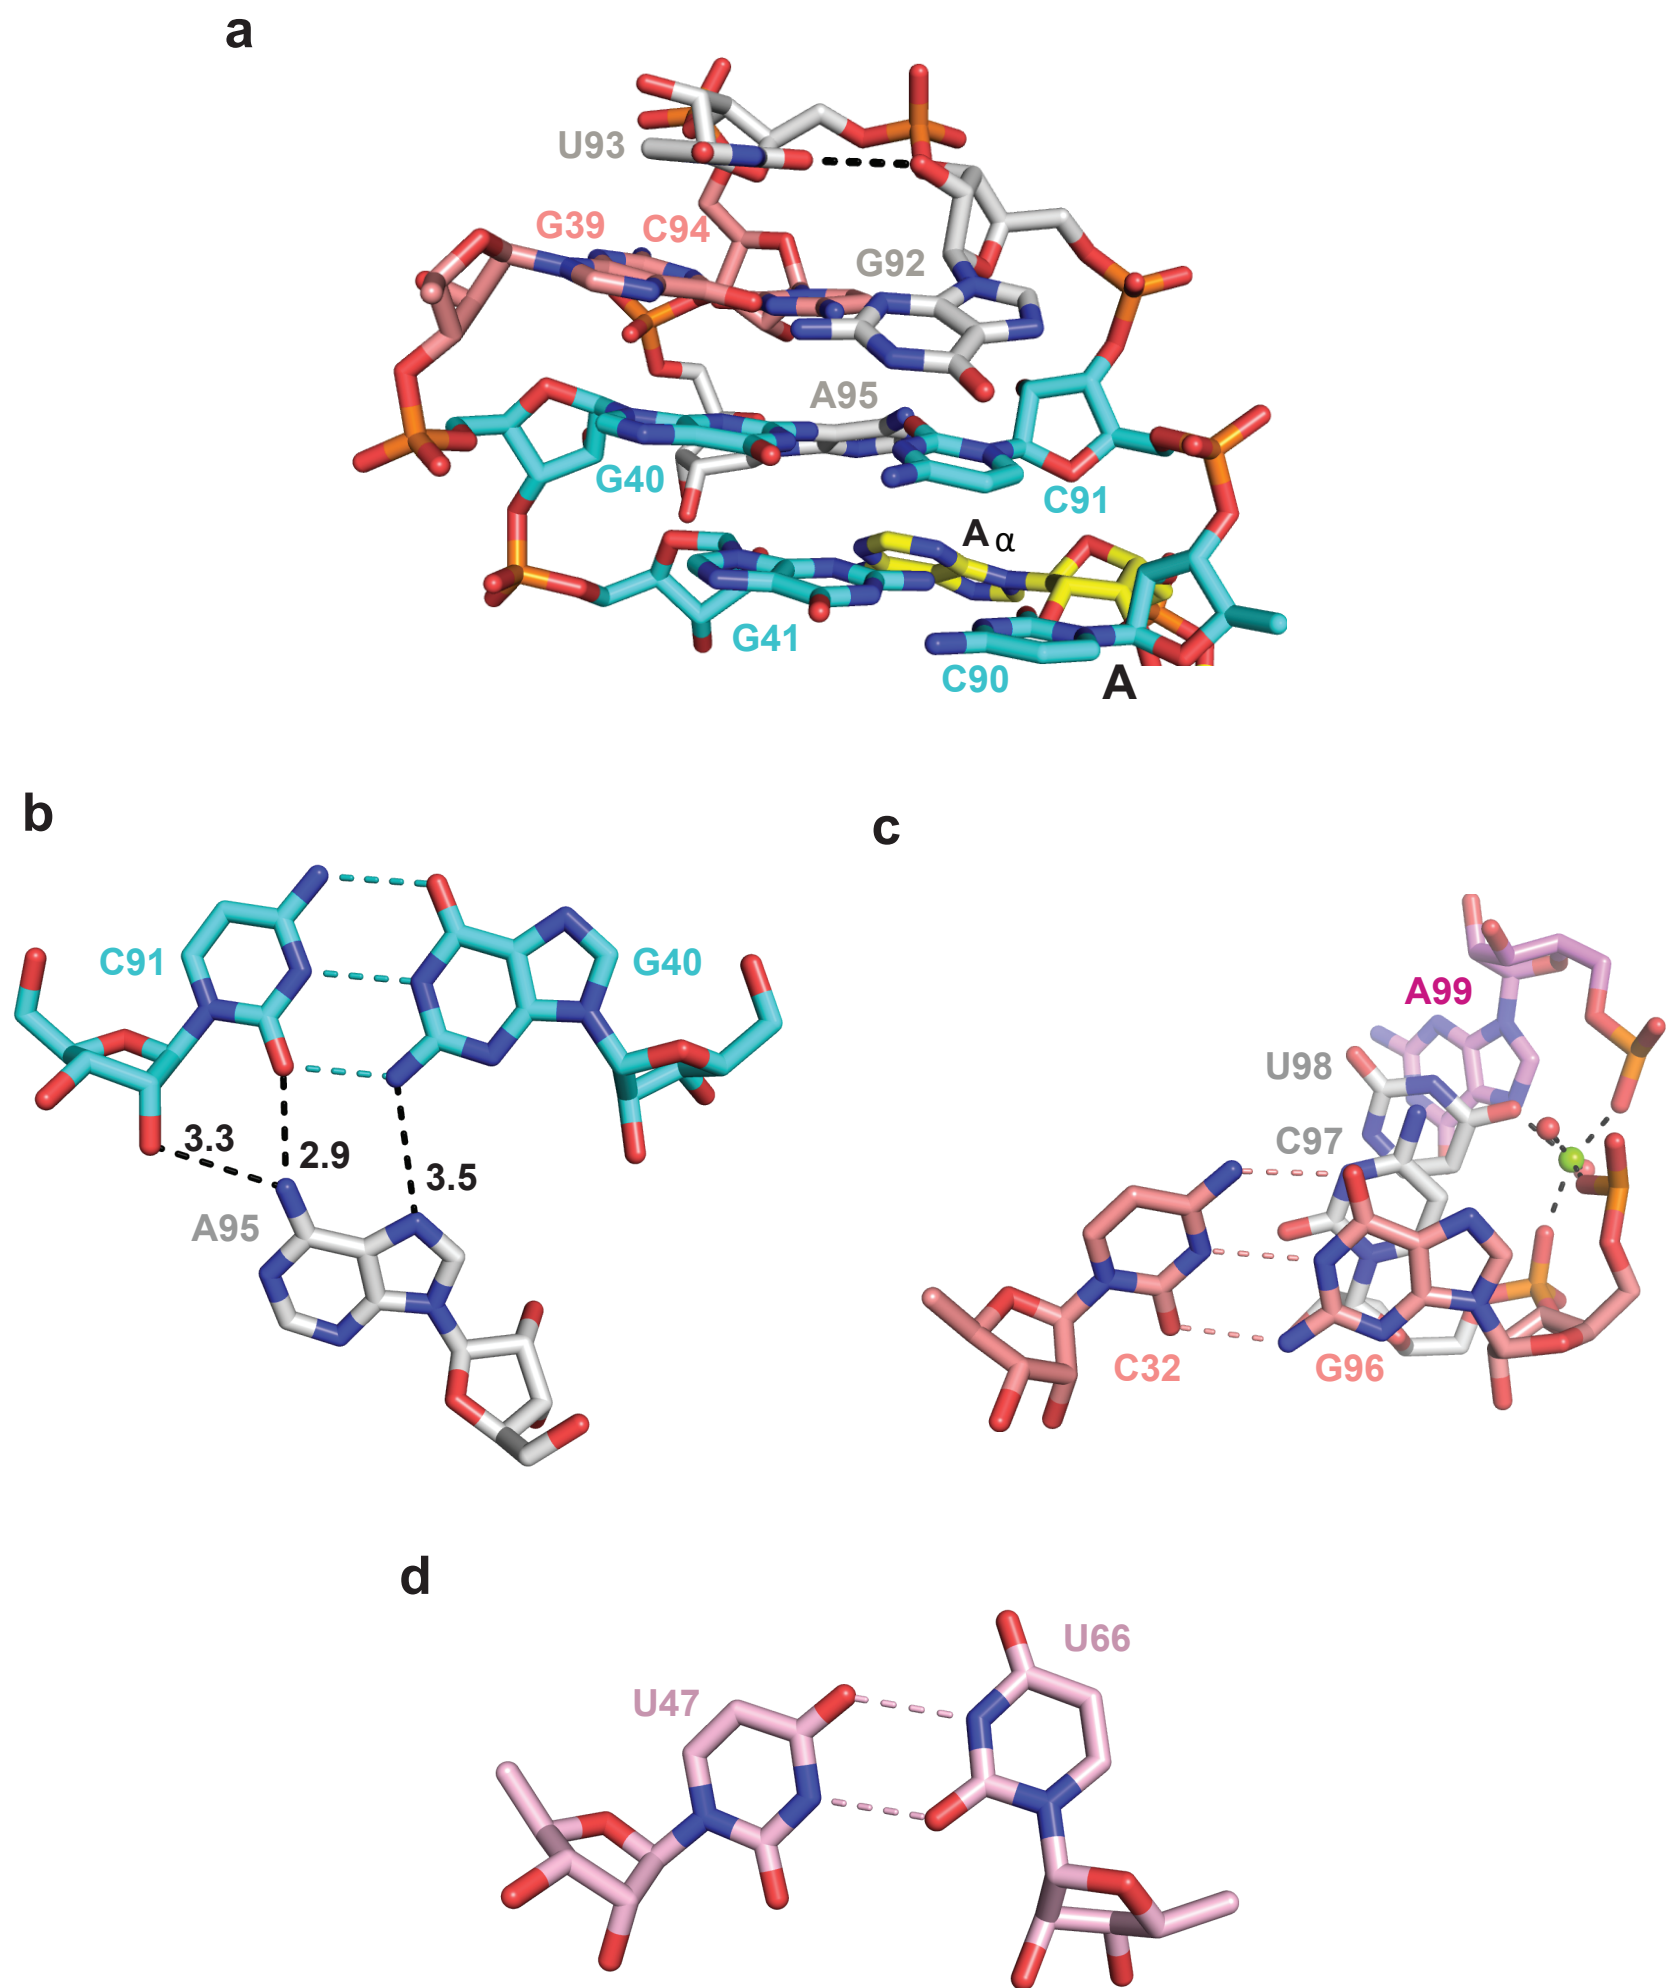

**Supplementary Figure 9 | Higher order pairing alignments associated with c-di-AMP binding pocket A and flanking segments composed of helices P2 and P3 and bubble domain of the bound state of the *T. tengcongensis ydaO* riboswitch, together with alignment of terminal sheared U•U pairs of stem P4. **a**, Stacking and pairing alignments of the extended stem formed by C90 to C94 and G39 to G41. **b**, Pairing alignment of the A-minor motif A95•(C91-G40) base triple. **c**, Pairing alignment of the Watson-Crick C32(*anti*)-G96(*anti*) pair and the role of Mg<sup>2+</sup> (green ball) in stabilizing this alignment. Note the continuous stacking from G96 to A99. **d**, Pairing alignment for the U47•U66 pair in the complex.**

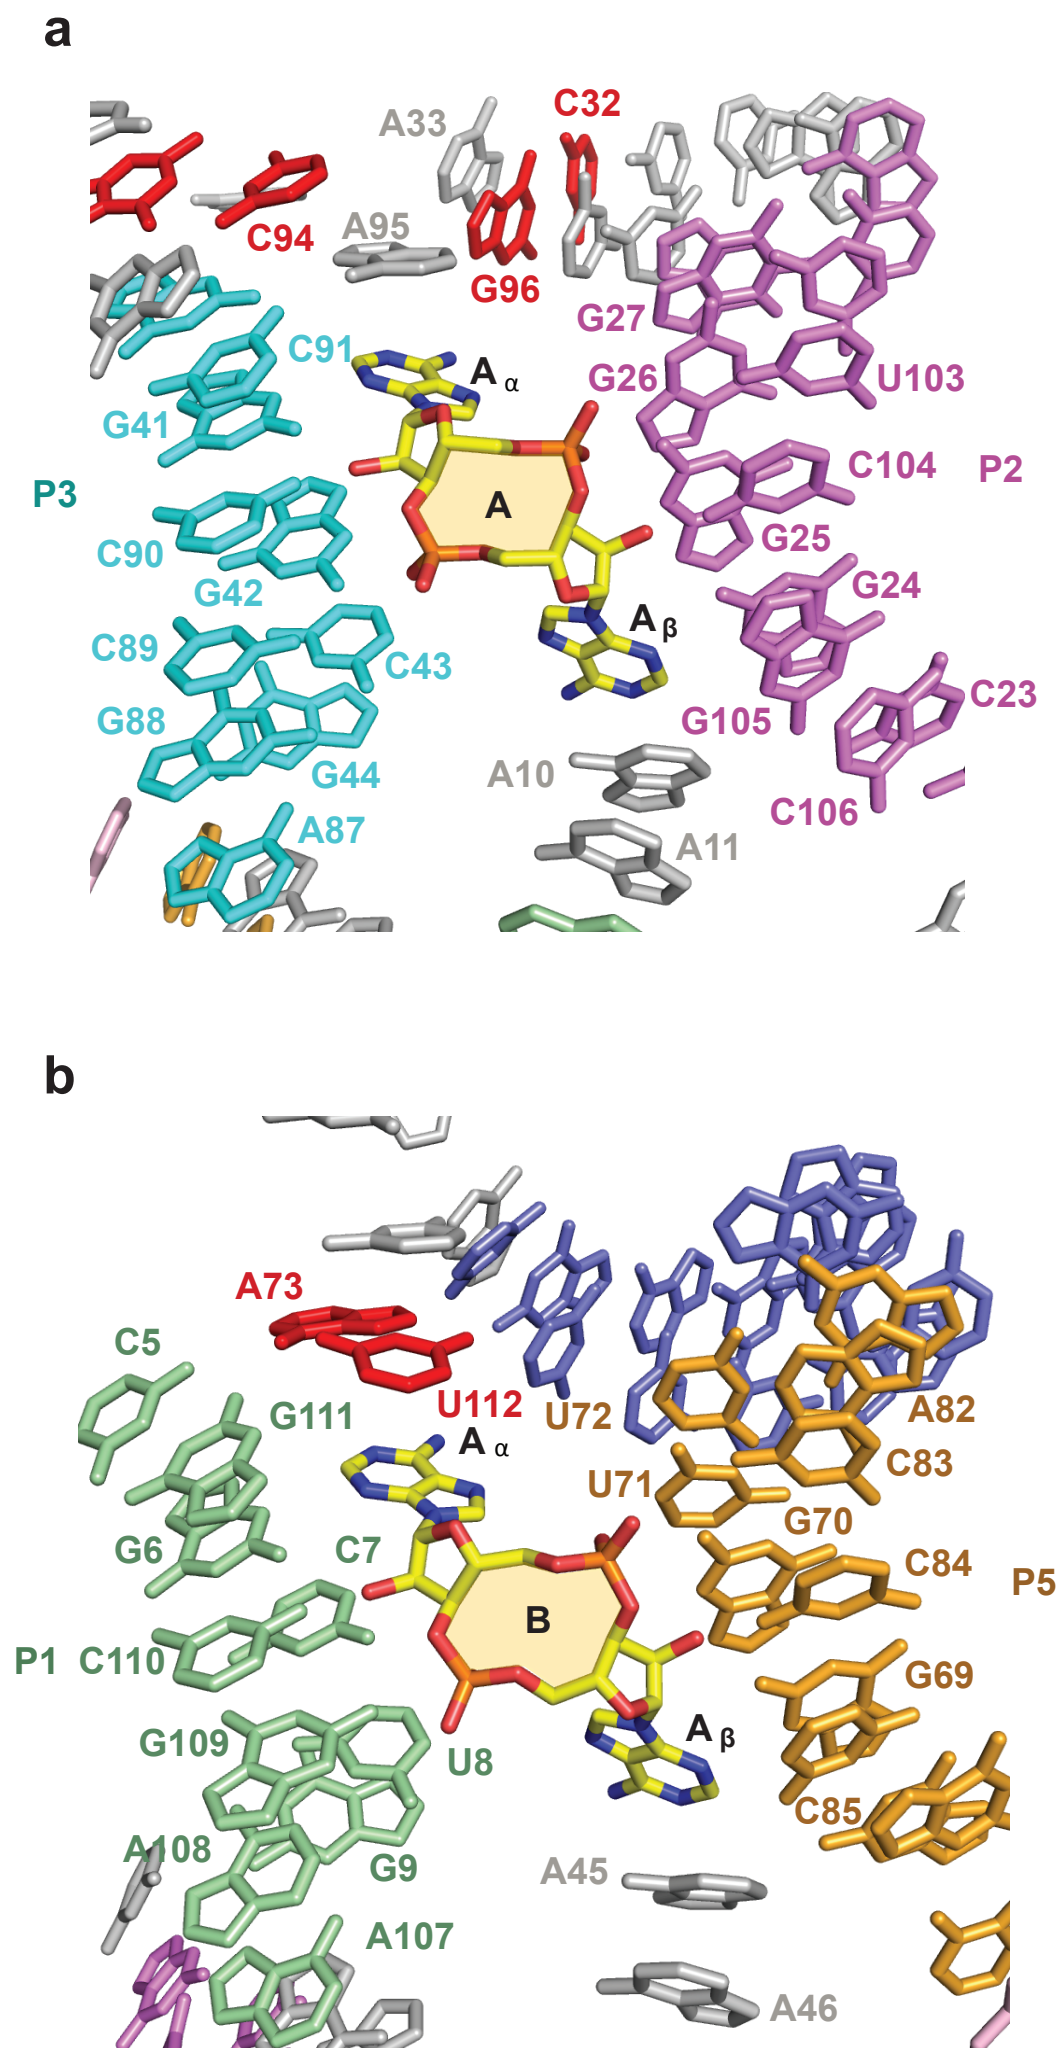

**Supplementary Figure 10 | Similarities in recognition features between c-di-AMP molecules A and B bound within their respective binding pockets in the structure of the *T. tengcongensis* ydaO riboswitch bound to c-di-AMP. a, c-di-AMP molecule A (in yellow) bound within its pocket composed of stems P2 (in purple) and P3 (in cyan) and bubble (in grey) segments. b, c-di-AMP molecule B (in yellow) bound within its pocket composed of stems P1 (in green) and P5 (in orange) and pseudoknot duplex (in blue) segments. Only the bases of the RNA are shown in panels a and b, with the sugar-phosphate backbone removed in the interest of clarity.**

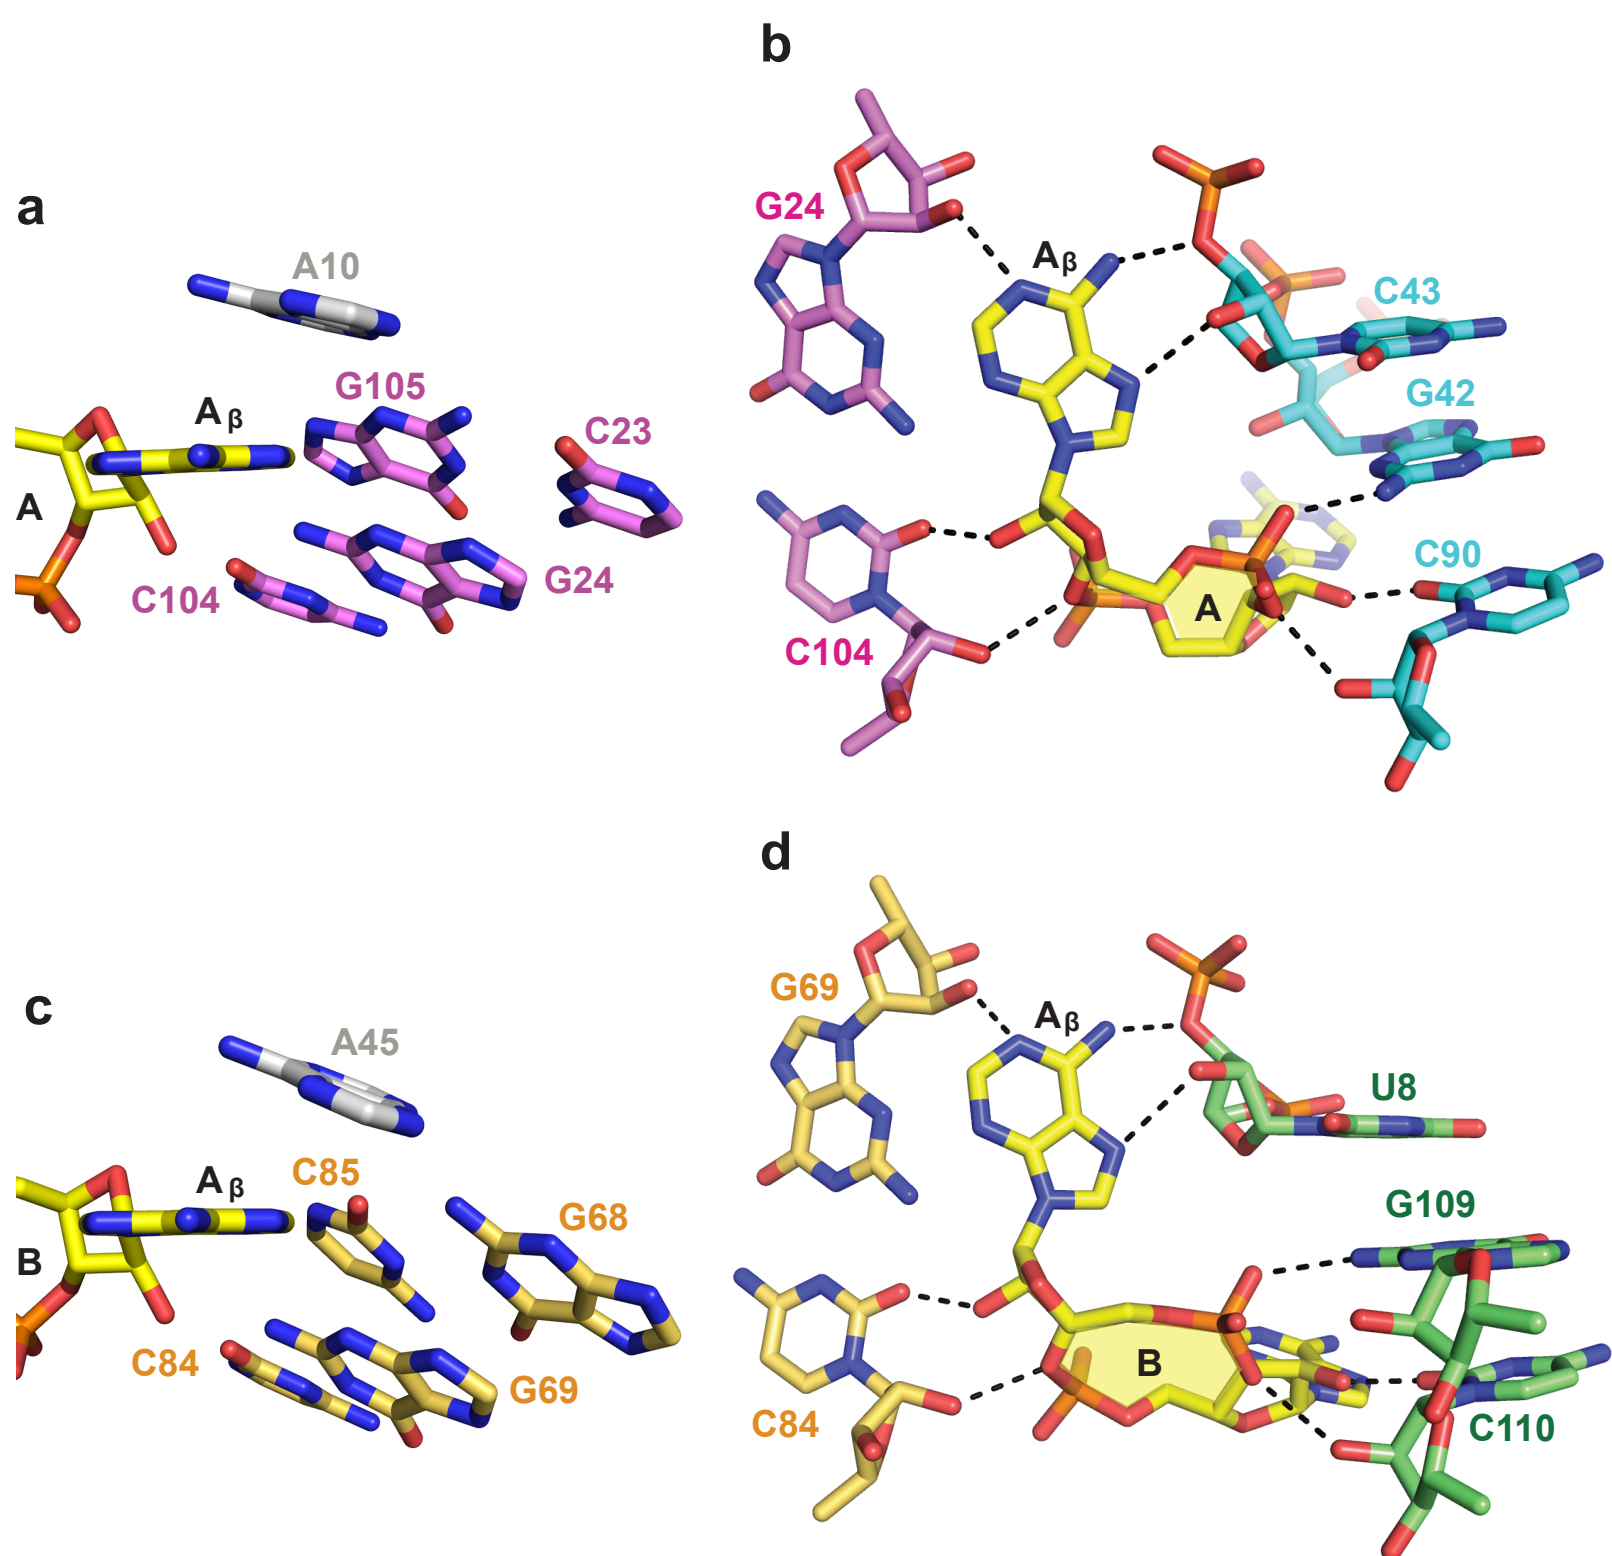

**Supplementary Figure 11 | Similarities in recognition features between A $\beta$  rings of c-di-AMP molecules A and B bound within their respective binding pockets in the structure of *T. tengcongensis* ydaO riboswitch bound to c-di-AMP.** **a**, Wedge-shaped insertion of the A $\beta$  ring of c-di-AMP molecule A (in yellow) between bases of stem P2 (in purple), with the A $\beta$  ring stacking on A10. **b**, Intermolecular hydrogen bonds between the A $\beta$  ring of c-di-AMP molecule B (in yellow) and the sugar rings of stems P2 (in purple) and P3 (in cyan). **c**, Wedge-shaped insertion of the A $\beta$  ring of c-di-AMP molecule B (in yellow) between bases of stem P5 (in orange), with the A $\beta$  ring stacking on A45. **d**, Intermolecular hydrogen bonds between the A $\beta$  ring of c-di-AMP molecule B (in yellow) and the sugar rings of stems P1 (in green) and P5 (in orange).

a

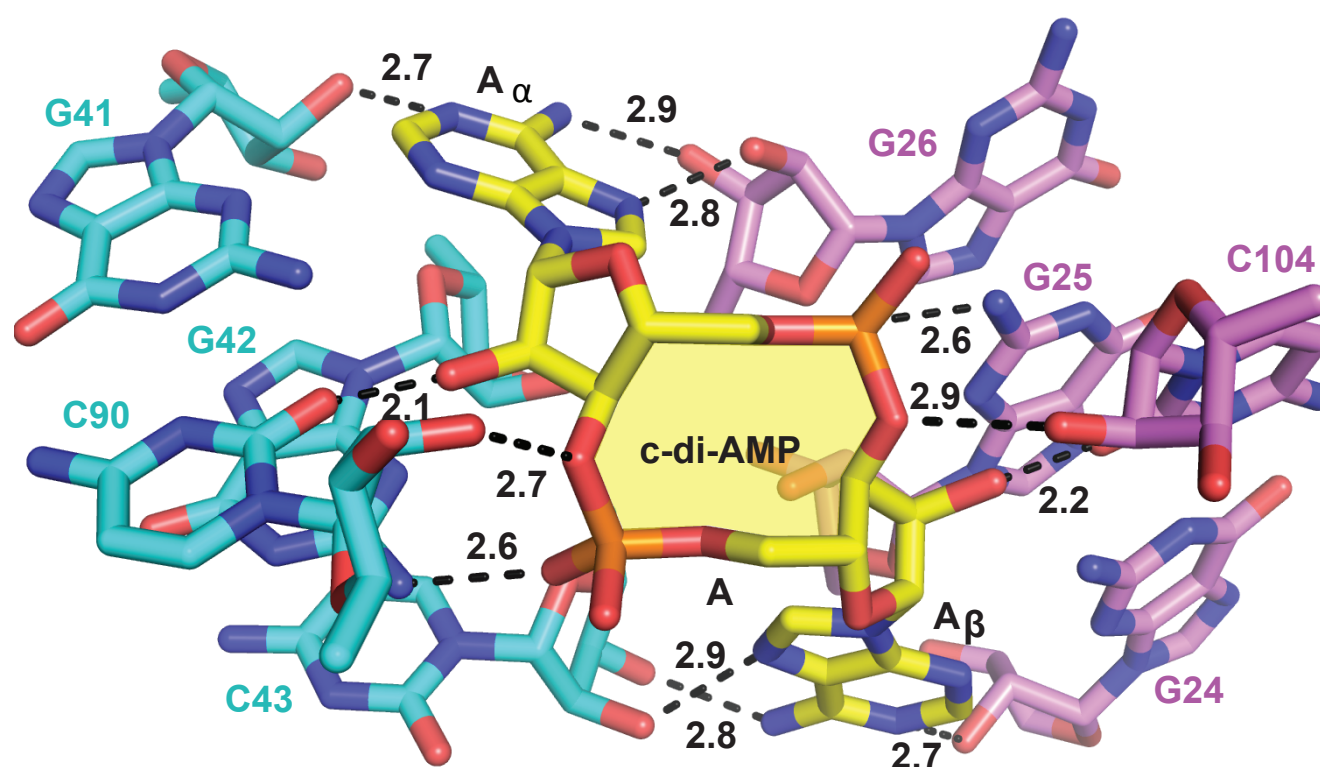

Supplementary Figure 12 | Intermolecular hydrogen bond lengths between c-di-AMP and RNA residues within the binding pocket of the structure *T. tengcongensis* ydaO riboswitch bound to c-di-AMP. The intermolecular hydrogen bond lengths are depicted in Å (heteroatom to heteroatom).

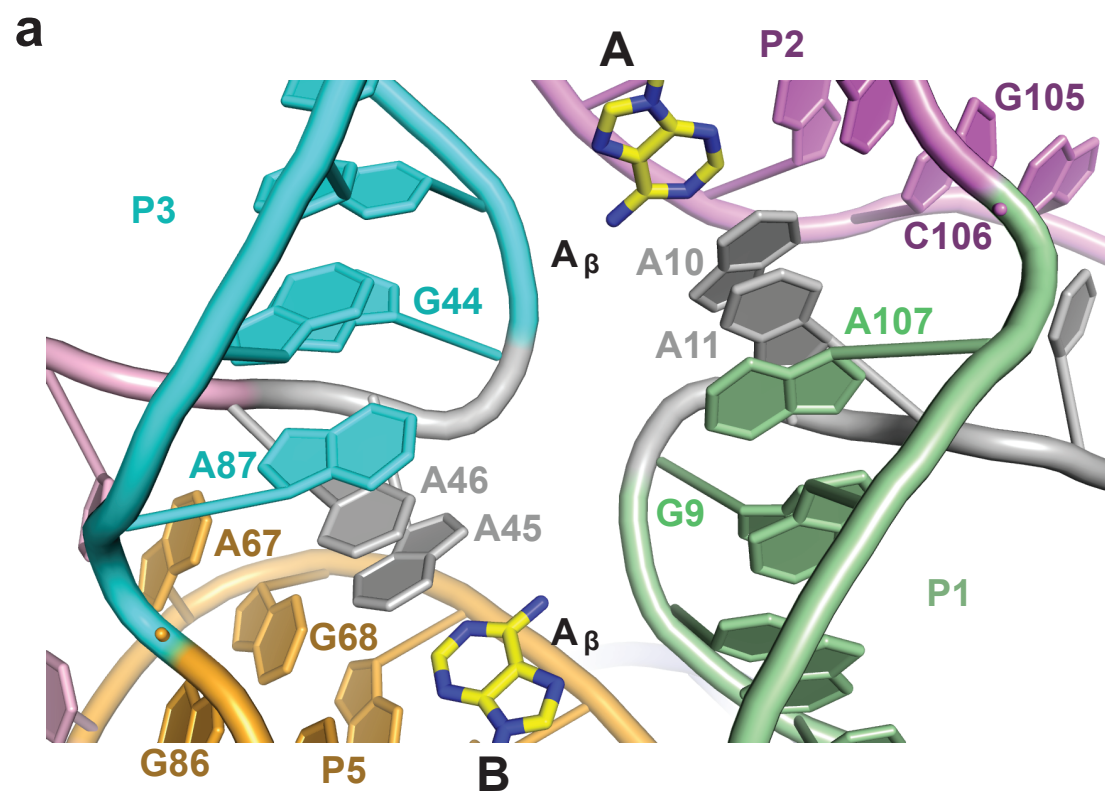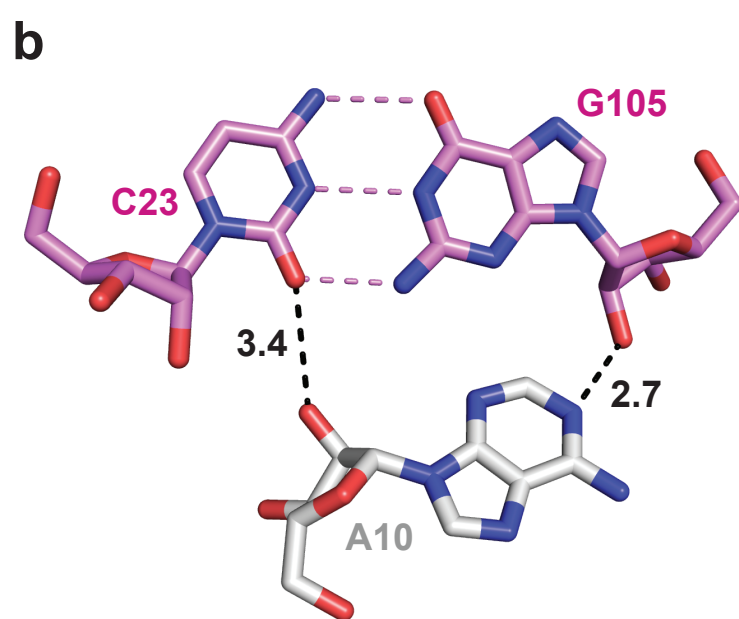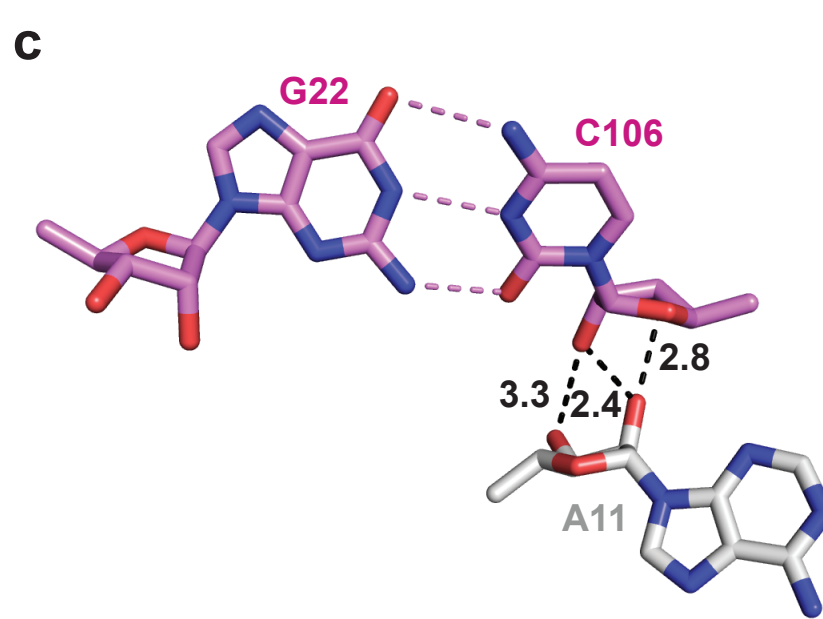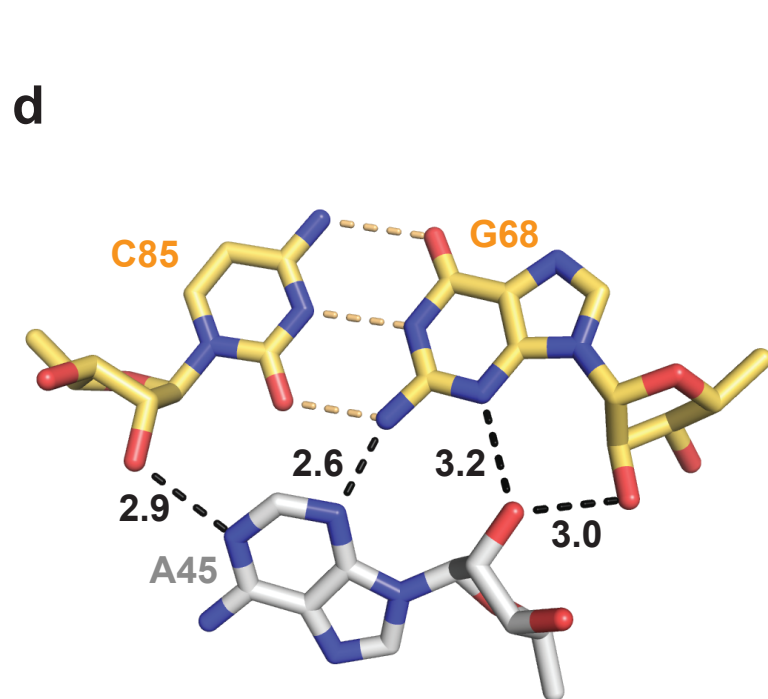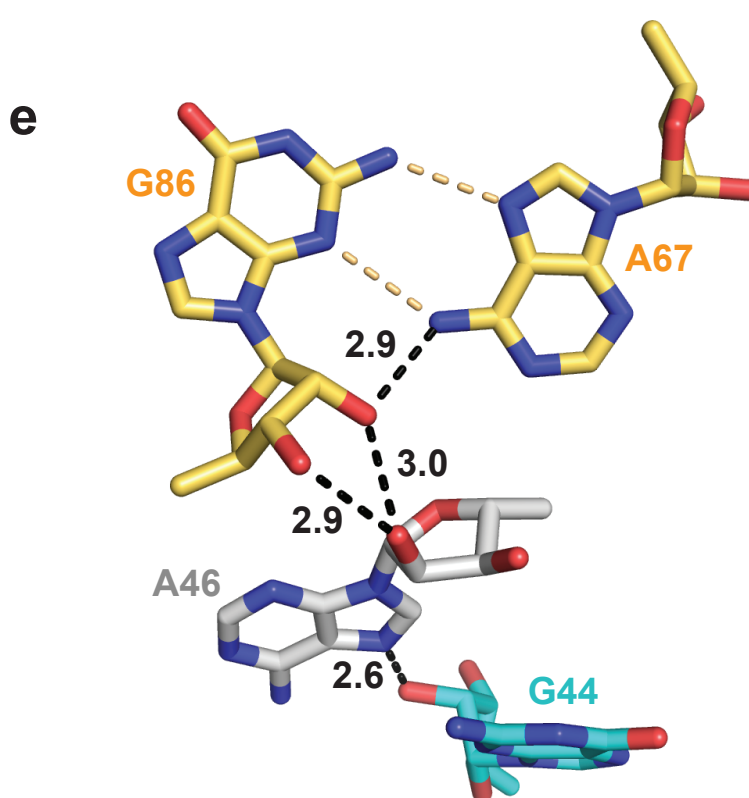

**Supplementary Figure 13 | Local symmetry and pairing alignments identified in the central region of the *T. tengcongensis* ydaO riboswitch bound to c-di-AMP.** **a**, Folding topology of the central region between two c-di-AMP binding pockets in the *ydaO* riboswitch complex. Junctional nucleotides A10 and A11 (in grey) continue stacking on stem P1 (in green) and form A-minor motif interaction and sugar-base recognition with stem P2 (in purple). Junctional nucleotide A45 and A46 (in grey) continue stacking on stem P3 (in cyan) and form A-minor motif interaction and sugar-base recognition with stem P5 (in orange). **b**, Pairing alignment of the A-minor motif A10•(C23-G105) base triple. **c**, Positioning of the sugar ring of A11 in the minor groove of the G22•C106 base pair. **d**, Pairing of the A-minor motif A45•(C85-G68) base triple. **e**, Positioning of the sugar ring of A46 in the minor groove of the sheared G86•A67 non-canonical pair. The hydrogen bond lengths shown in panels b to e are in Å (heteroatom to heteroatom).

**a**

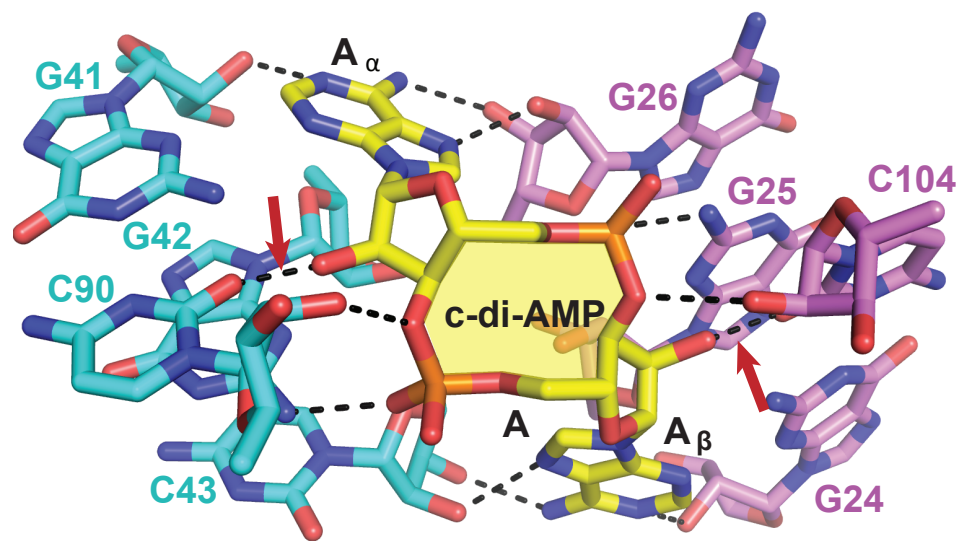

**b**

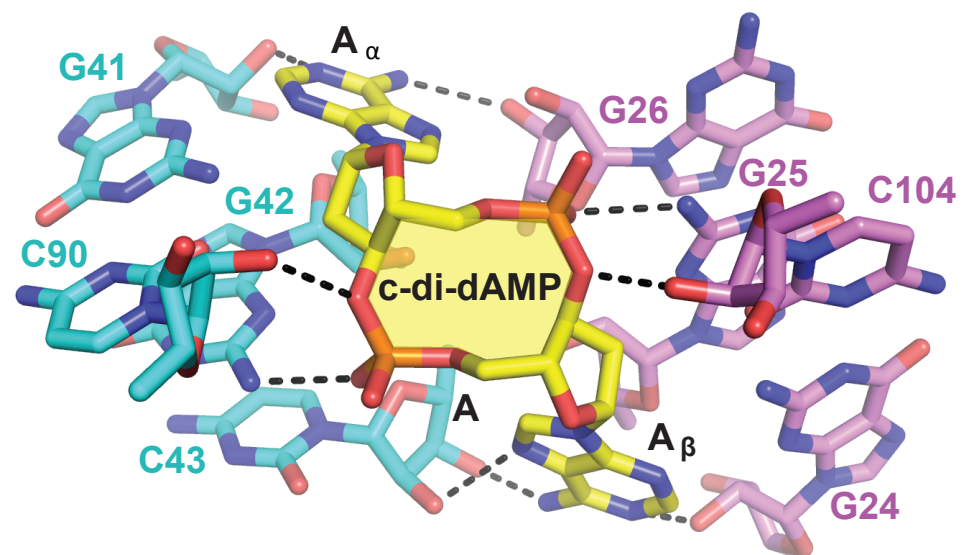

**Supplementary Figure 14 | Structures of *T. tengcongensis ydaO* riboswitch bound to c-di-AMP and c-di-dAMP. a**, Intermolecular hydrogen bonds between c-di-AMP and the *ydaO* riboswitch, with those involving the sugar 2'-OH groups of c-di-AMP indicated by a red arrow. **b**, Intermolecular hydrogen bonds between c-di-dAMP and the *ydaO* riboswitch.

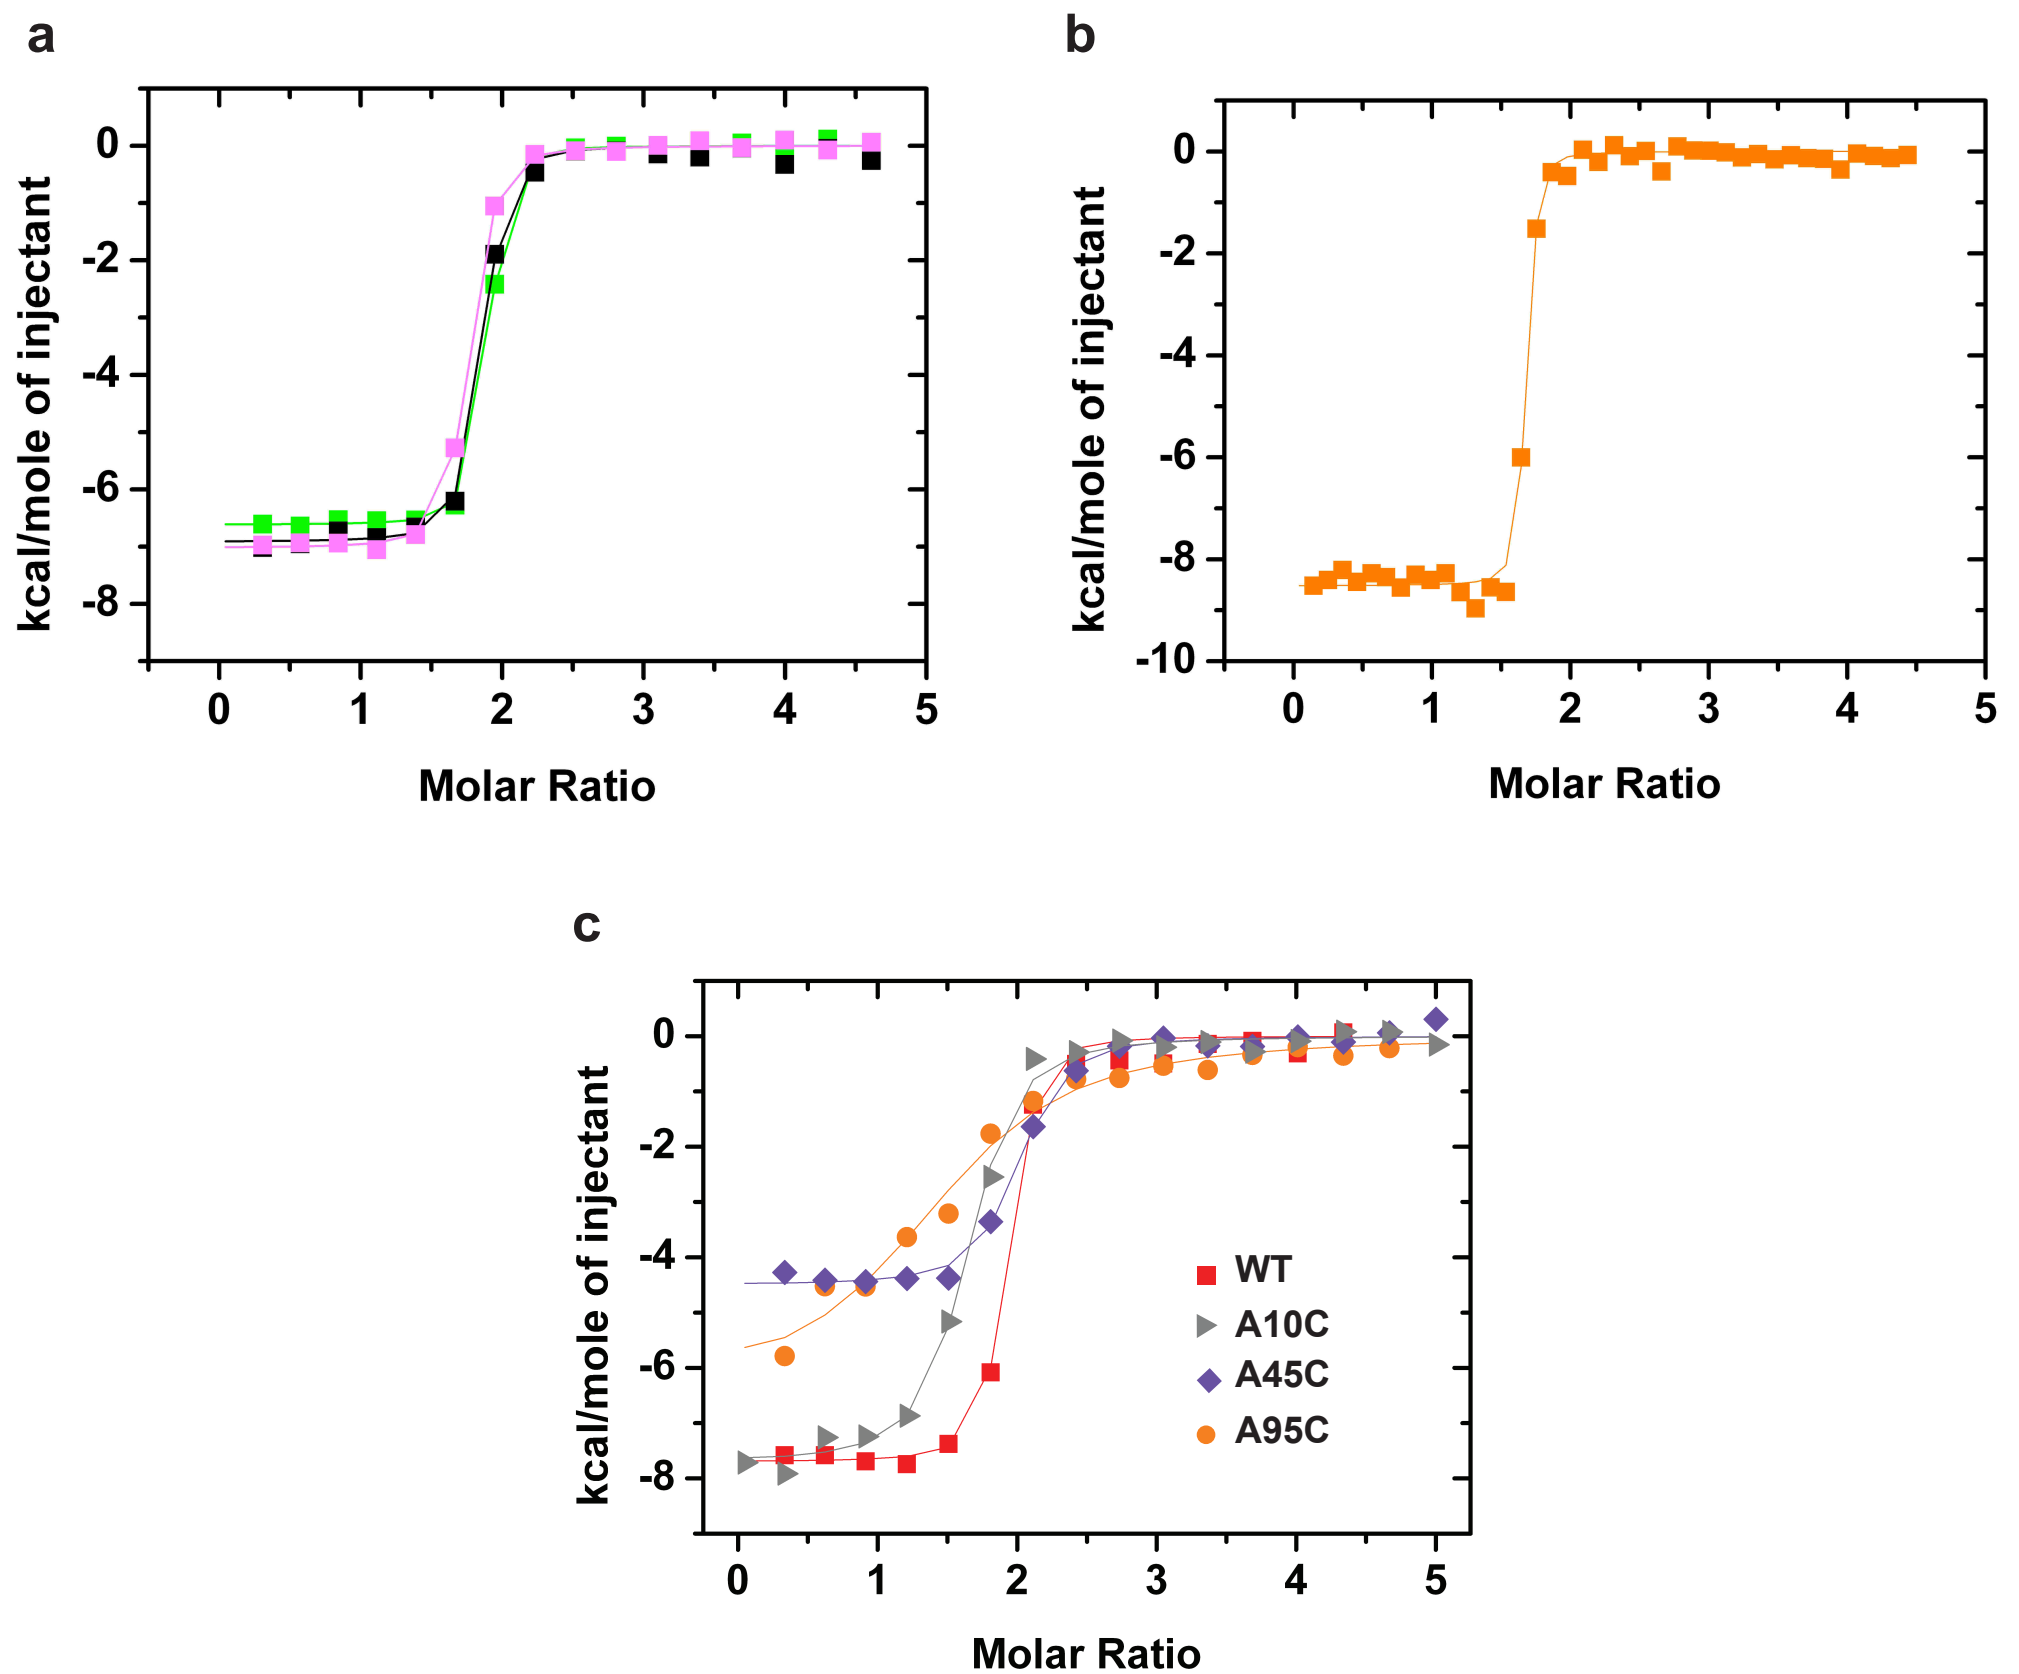

**Supplementary Figure 15 | Reproducibility of ITC curves for the binding of c-di-AMP to the *T. tengcongensis* *ydaO* riboswitch and mutants involved in A-minor triples interaction in the *T. tengcongensis* *ydaO* riboswitch. **a**, Superposition of three ITC curves for the binding of c-di-AMP to the *T. tengcongensis* *ydaO* riboswitch. **b**, ITC curve for the binding of c-di-AMP to the *T. tengcongensis* *ydaO* riboswitch with smaller increments of c-di-AMP added to the riboswitch. **c**, Replacement one at a time of adenines in A-minor triples involving A10, A45 and A95 by C. In panels a to c, the c-di-AMP was added gradually to mutants of *T. tengcongensis* *ydaO* riboswitch.**

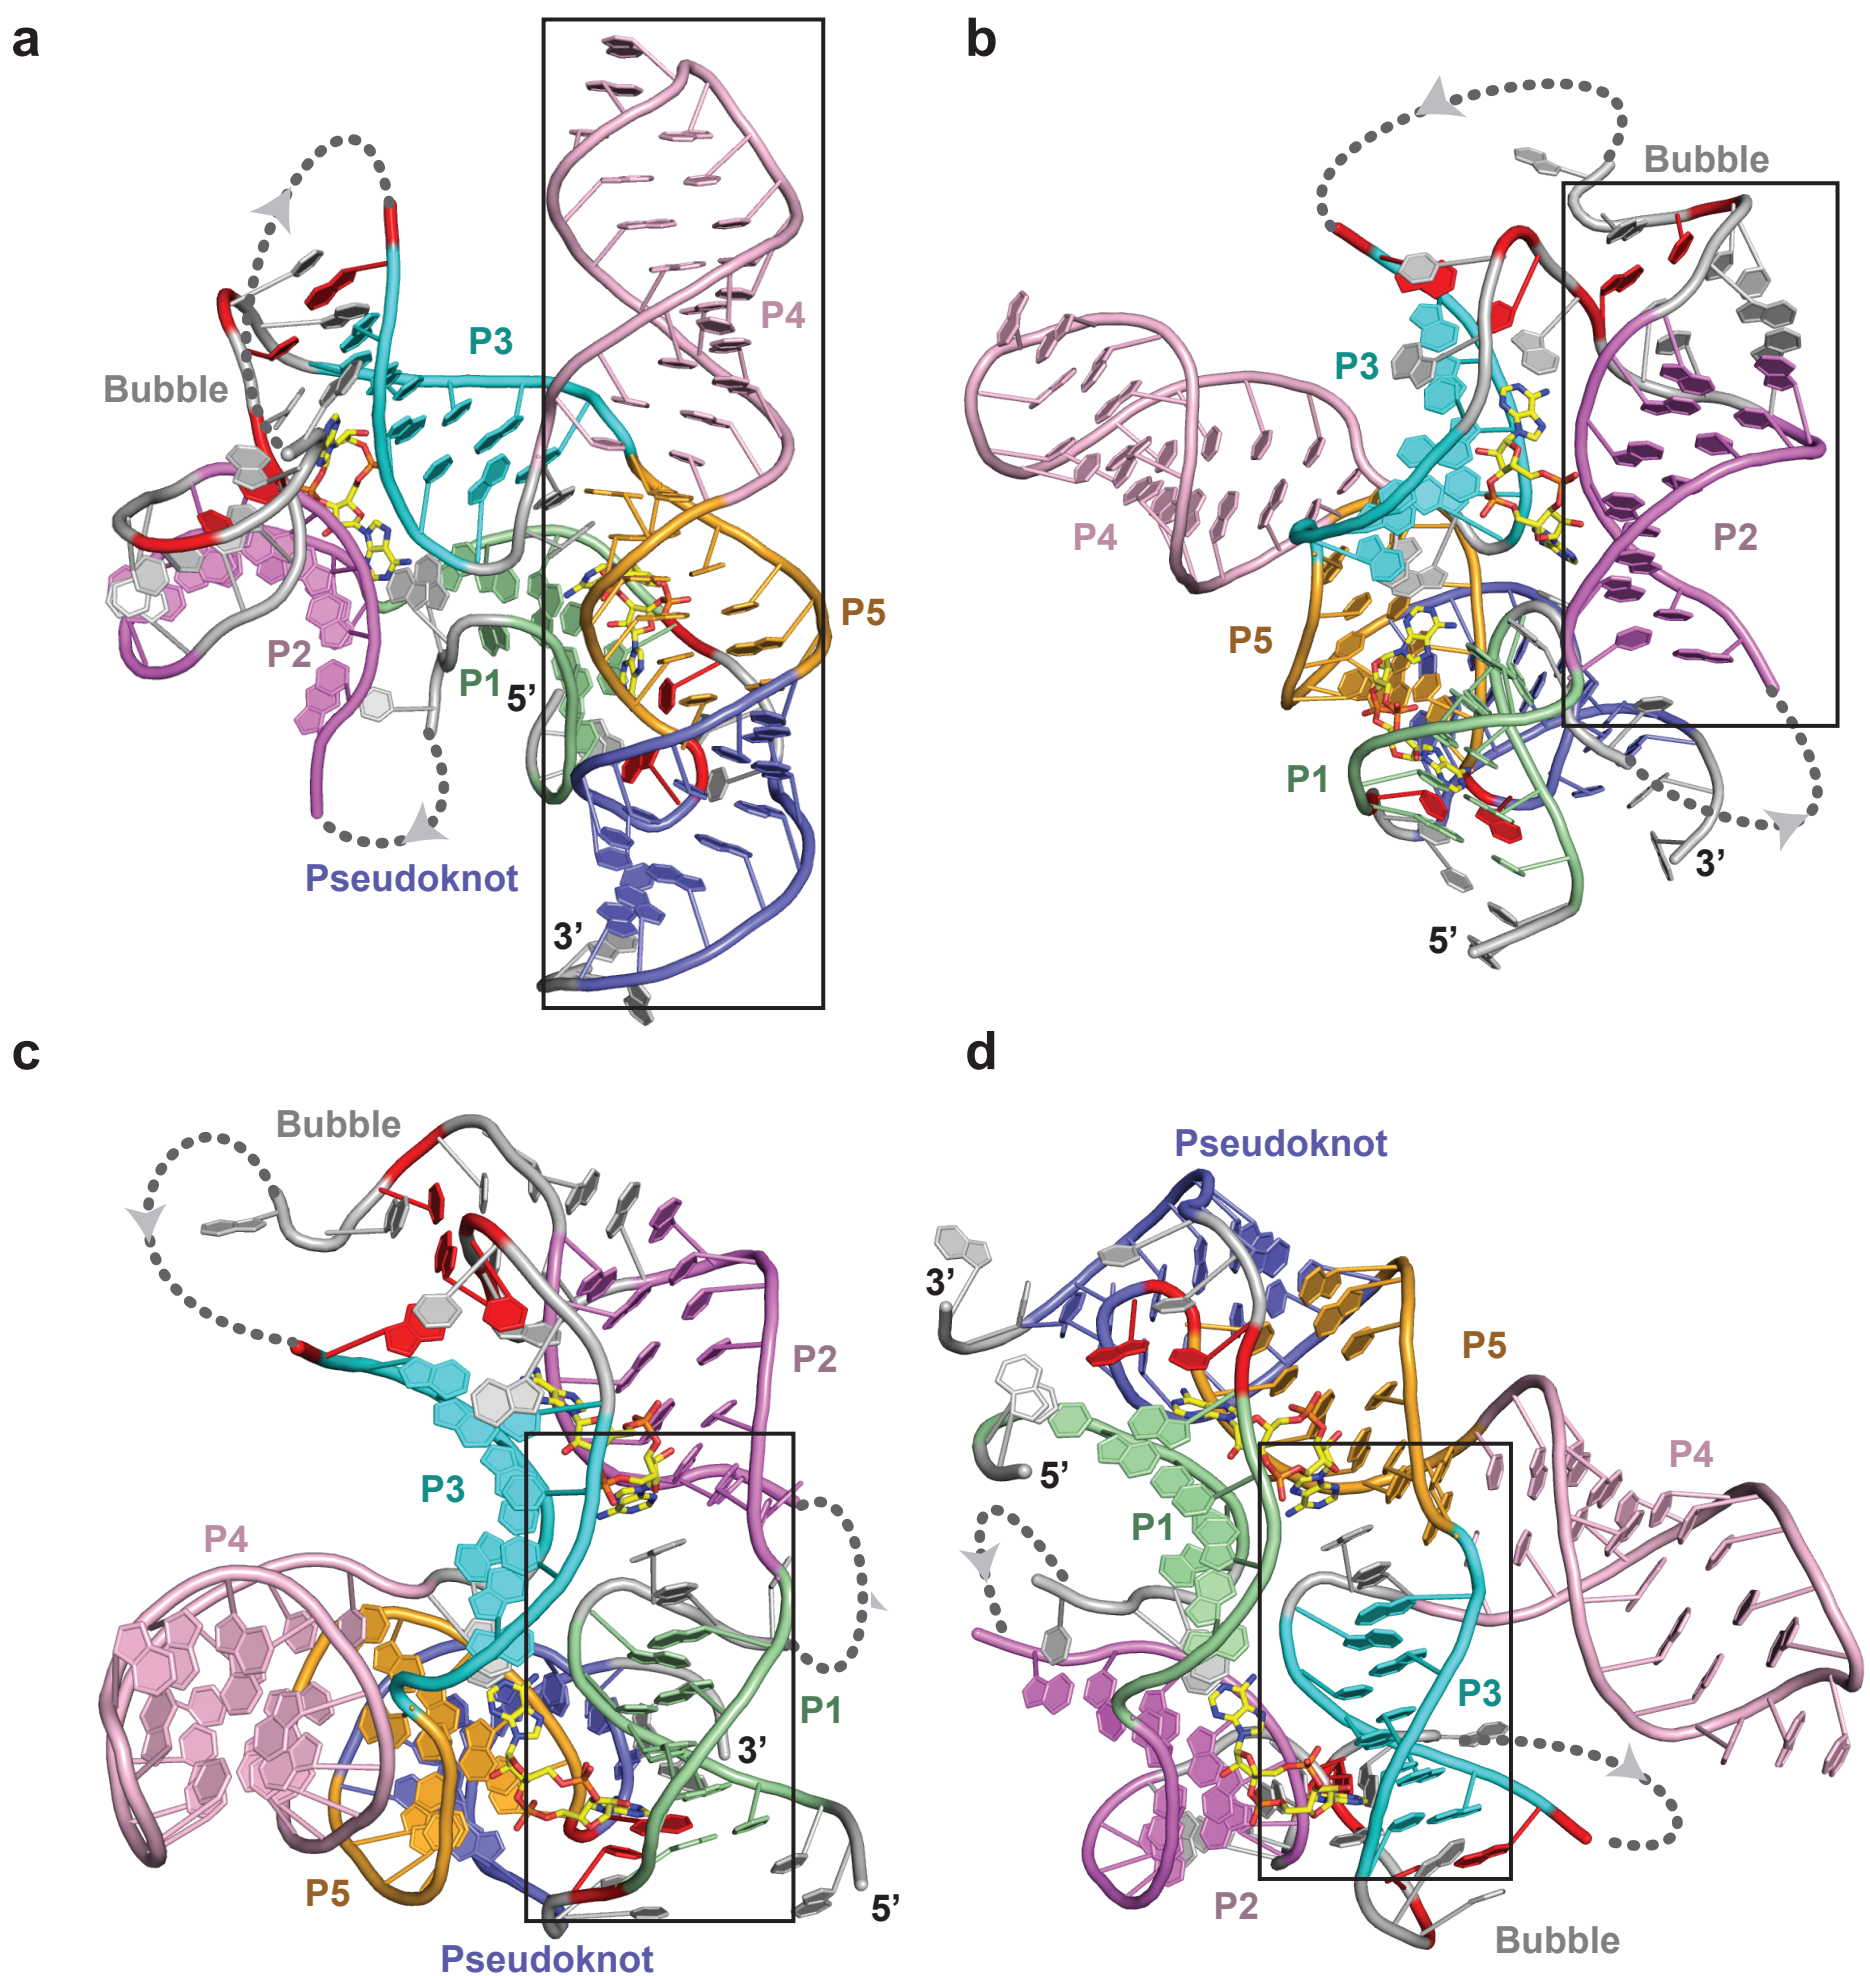

**Supplementary Figure 16 | Alternate views of the crystal structure of the *T. tengcongensis ydaO* riboswitch bound to two molecules of c-di-AMP.** **a**, This view emphasizes collinear stacking of stem P4, stem P5, and pseudoknot-derived stem (boxed segment) in the complex. **b**, This view emphasizes collinear stacking of stem P2 and elements of the zippered up bubble (boxed segment) in the complex. **c**, This view emphasizes collinear stacking of stem P1 and the adenine ring of c-di-AMP molecule A (boxed segment) in the complex. **d**, This view emphasizes collinear stacking of stem P3 and the adenine ring of c-di-AMP molecule B (boxed segment) in the complex.

a

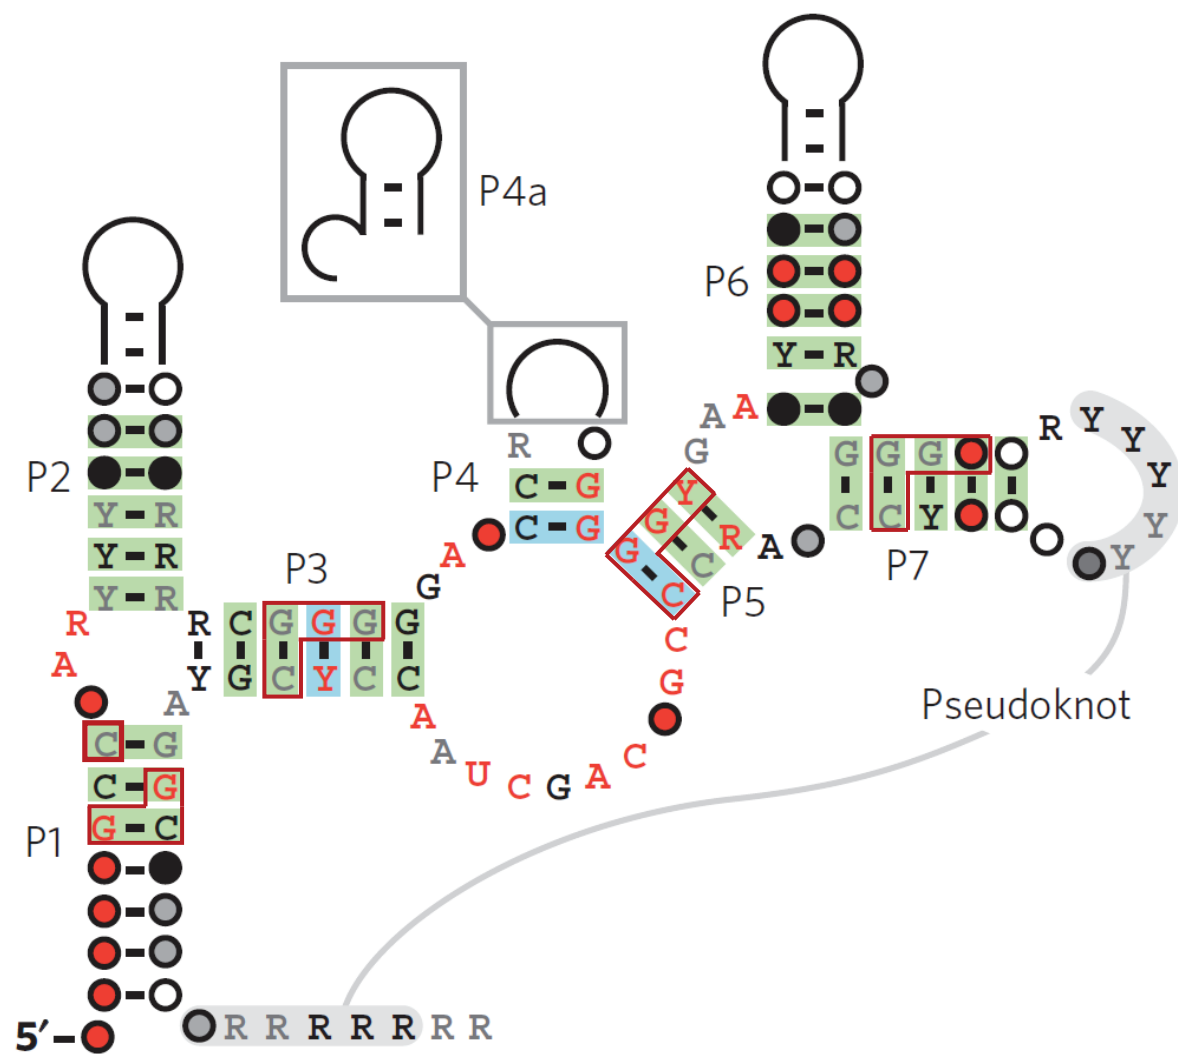

**Supplementary Figure 17 | Labeling of binding pocket residues within the consensus sequence and secondary structure of the *ydaO* riboswitch as reported in ref. 20.** Nucleotides present in greater than 97%, 90% and 75% are represented in red, black and grey<sup>20</sup>. The boxed segments label binding pocket residues identified in the structure of the *T. tengcongensis ydaO* riboswitch bound to two molecules of c-di-AMP.

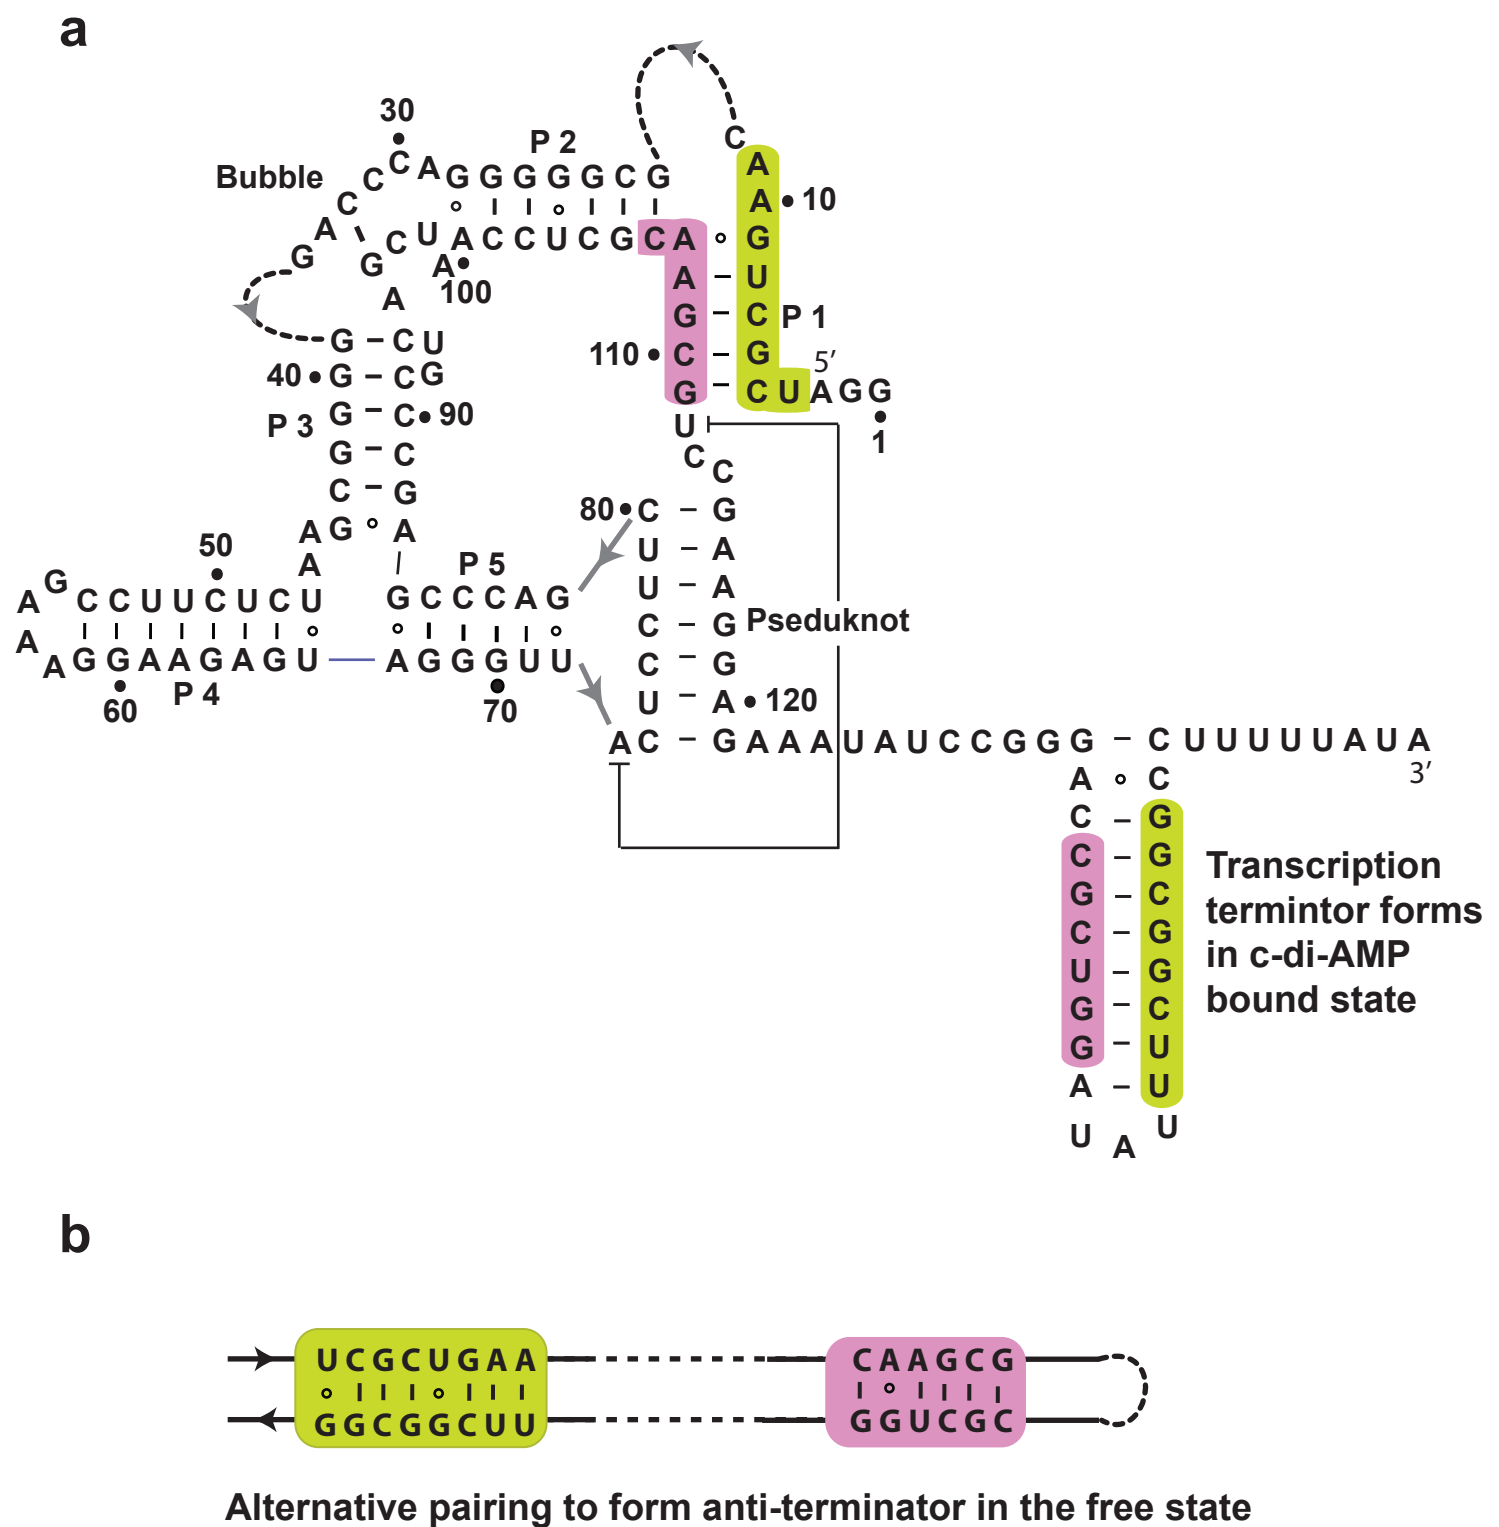

**Supplementary Figure 18 | *T. tengcongensis* c-di-AMP *ydaO* riboswitch potentially functions through a transcription termination pathway. a**, The secondary fold of the *ydaO* riboswitch in the c-di-AMP bound state. This segment contains the sensing domain and adjacent 3'-expression platform segment, a portion of which forms a transcription terminator. **b**, Alternate pairing alignment to form an antiterminator following disruption of stem P1 and the stem-loop of the terminator.

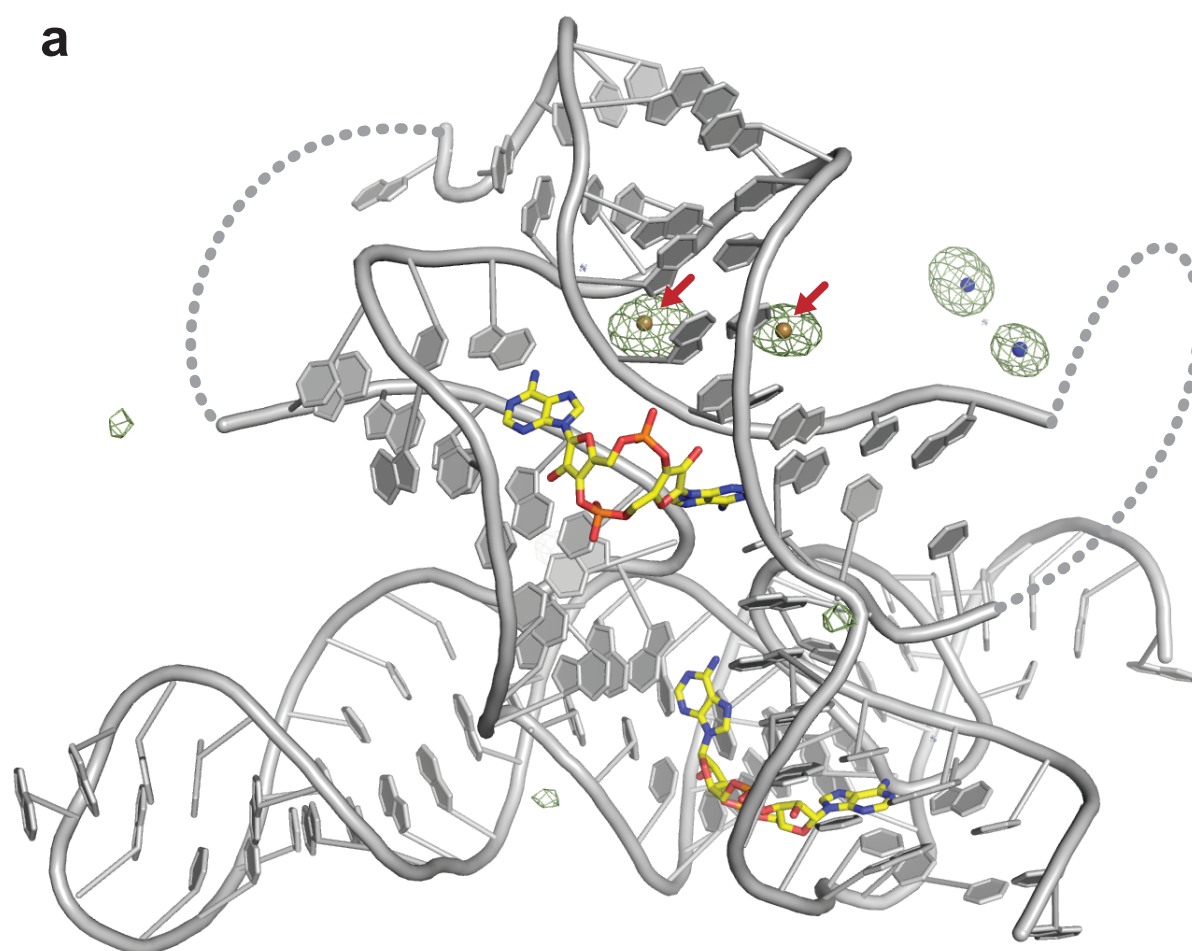

**Supplementary Figure 19 | Location of two  $\text{Ir}(\text{NH}_3)_6^{3+}$  binding sites in the sensing domain of the ligand-bound *T. tengcongensis* *ydaO* riboswitch.** The refined c-di-AMP bound riboswitch structure based on a 2.73 Å  $\text{Ir}^{3+}$  SAD data set superposed with the anomalous  $\text{Ir}^{3+}$  map (green) contoured at  $5\sigma$  level. The two bound  $\text{Ir}^{3+}$  ions are shown as brown spheres and indicated by red arrows. The blue spheres represent symmetry-related  $\text{Ir}^{3+}$  ions.
